# Supplementary material
Source: PubMed Central journal article supplement (PMC6320282)
Supplement: NIHMS1510579-supplement-2.pdf [file NIHMS1510579-supplement-2.pdf]

**A**

|                      |     |                                                                                  |     |
|----------------------|-----|----------------------------------------------------------------------------------|-----|
| <i>S. cerevisiae</i> | 1   | MDsKEVLVHVKNLEKN--KSNDAAVLEILHVLdKEFVPTEKLLRETKVGVENVKFKK-STNVEISKLVKKMISWKDAIN  | 77  |
| <i>M. musculus</i>   | 1   | ME-DEVVRIAKKMDKMQKNAAGALDLLKEL-KNIPMTLELLQSTRIGMSVNALRKQSTDEEVTSLAKSLIKSWKKLLD   | 78  |
| <i>H. sapiens</i>    | 1   | ME-DEVVRFQAKKMDKMQKNAAGALDLLKEL-KNIPMTLELLQSTRIGMSVNAIRKQSTDEEVTSLAKSLIKSWKKLLD  | 78  |
|                      |     |                                                                                  |     |
| <i>S. cerevisiae</i> | 78  | KNKRSRQAQQHHQDHAPgNAEDKTTVGEsvngvqqPASSQSDAMKQDKYVSTKPRNSK[8]YHHKLRDQVLKALYDVLAK | 162 |
| <i>M. musculus</i>   | 79  | GPSTDKDPEEKKEPAI-SSQNSPEAREESSSSSNVSSRKDETNARDTYVSSFPRAPS TSDSVRLKCREMLAAALRT    | 154 |
| <i>H. sapiens</i>    | 79  | GPSTEKDLDEKKKEPAI-TSQNSPEAREESTSSGNVSNRKDETNARDTYVSSFPRAPS TSDSVRLKCREMLAAALRT   | 154 |
|                      |     |                                                                                  |     |
| <i>S. cerevisiae</i> | 163 | ESEHPPQ--SILHTAKAIESEMNVnNCDTNEAAYKARYRIIYSNVISKNNPDLKHKIANGDITPEFLATCDAKDLAPAP  | 240 |
| <i>M. musculus</i>   | 155 | GDDYVAIGADEEELGSQIEEAIYQ--EIRNTDMKYKNRVRSRISNLKDAKNPNLRKNVLCGNIPPDLFARMTAEEMASDE | 232 |
| <i>H. sapiens</i>    | 155 | GDDYIAIGADEEELGSQIEEAIYQ--EIRNTDMKYKNRVRSRISNLKDAKNPNLRKNVLCGNIPPDLFARMTAEEMASDE | 232 |
|                      |     |                                                                                  |     |
| <i>S. cerevisiae</i> | 241 | LKQKIEEIAKQONLYNAQGATIERSVTDRFTCGKCKEKKVSYQIQTRSADEHMTTFCTCEACGNRWKFS            | 309 |
| <i>M. musculus</i>   | 233 | LKEMRKNLTKEAIREHQMAKTGGTQTDLFTCGKCKKKNCTYTQVQTRSADEHMTTFVVCNECGNRWKFC            | 301 |
| <i>H. sapiens</i>    | 233 | LKEMRKNLTKEAIREHQMAKTGGTQTDLFTCGKCKKKNCTYTQVQTRSADEHMTTFVVCNECGNRWKFC            | 301 |

**B**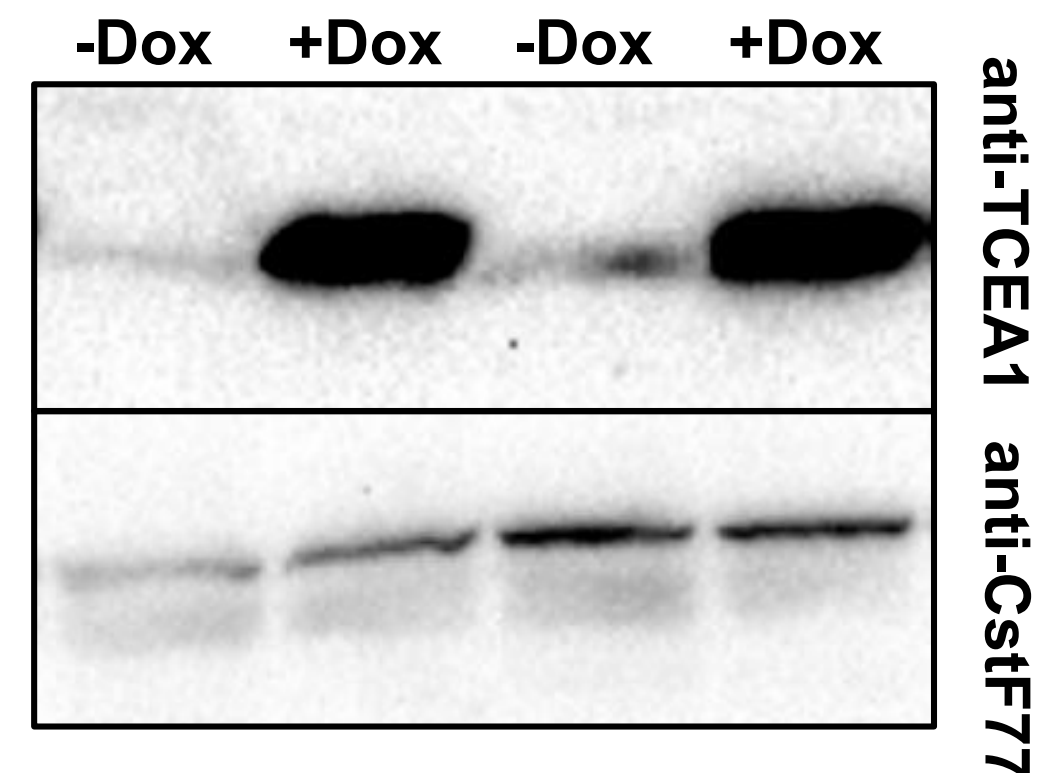**C**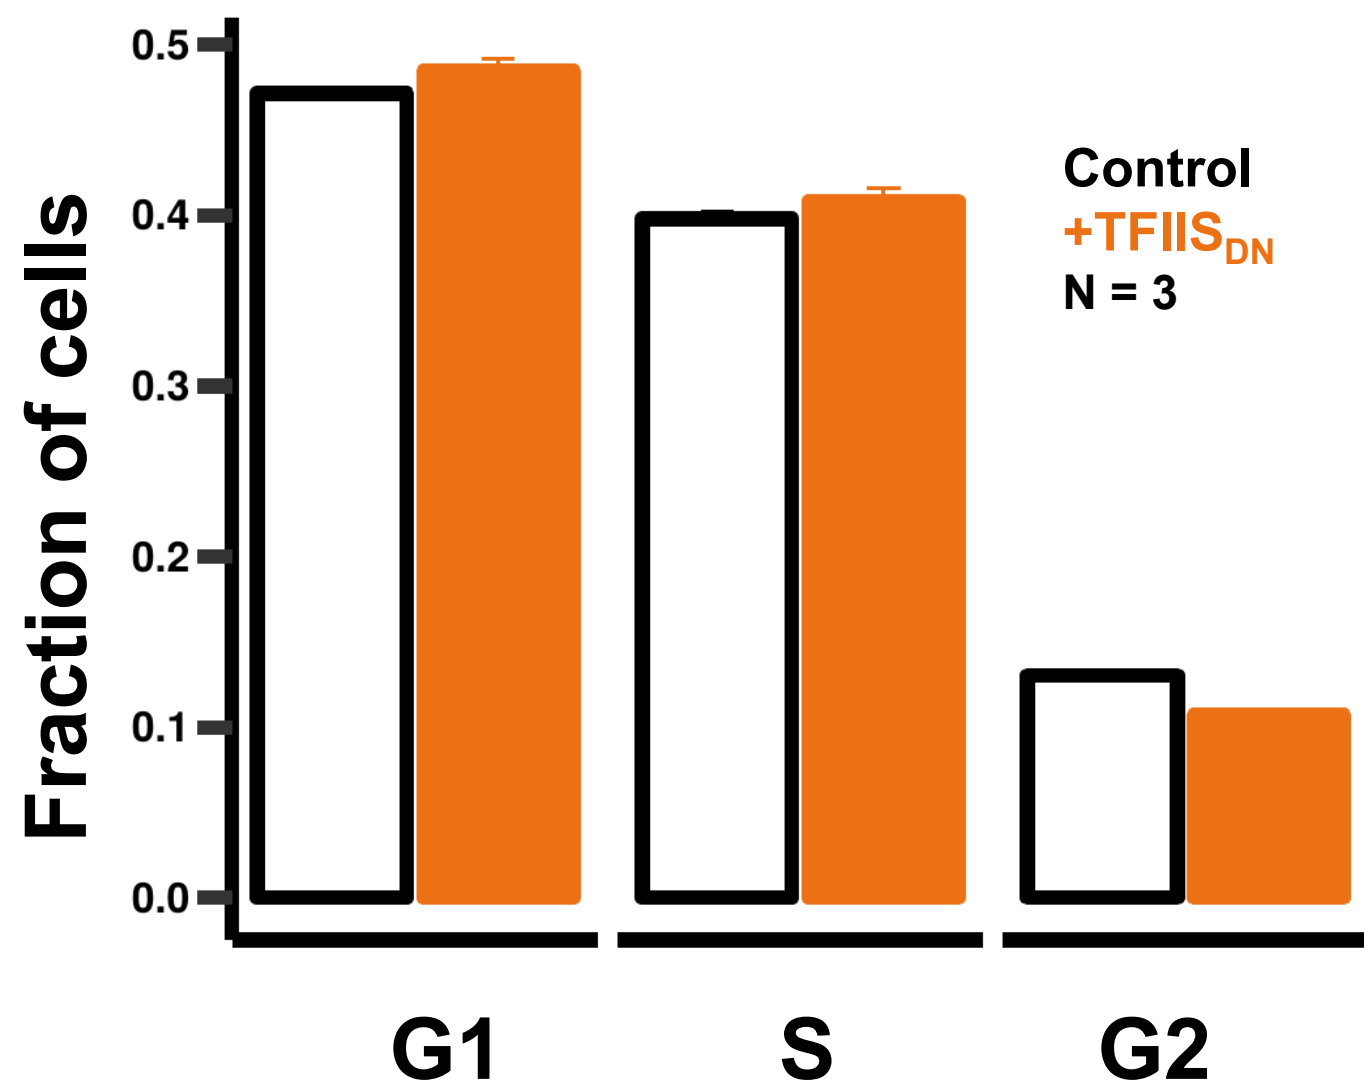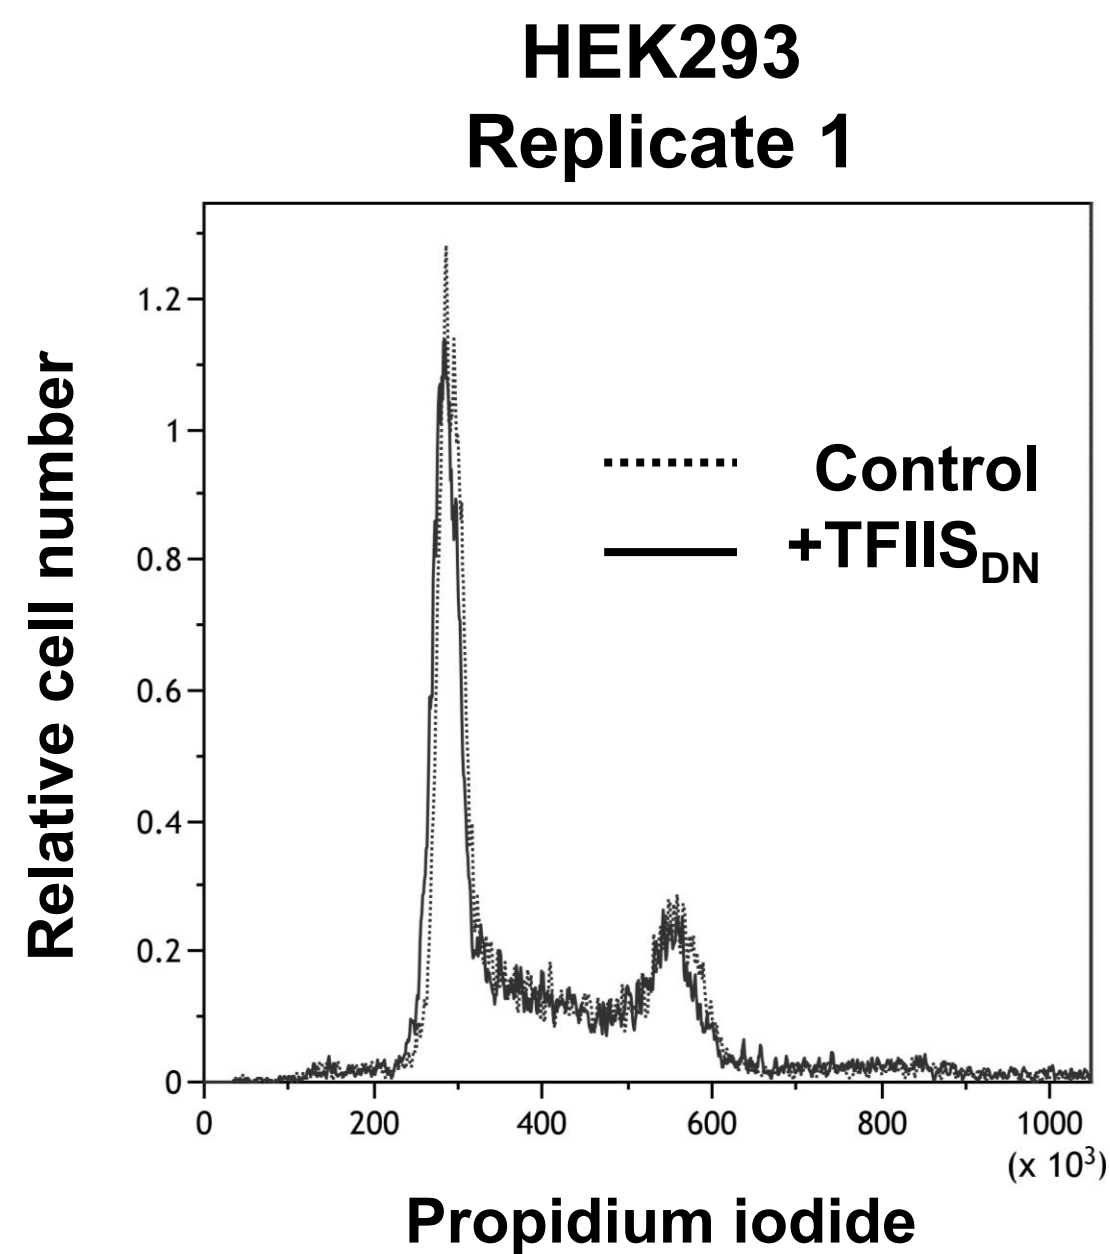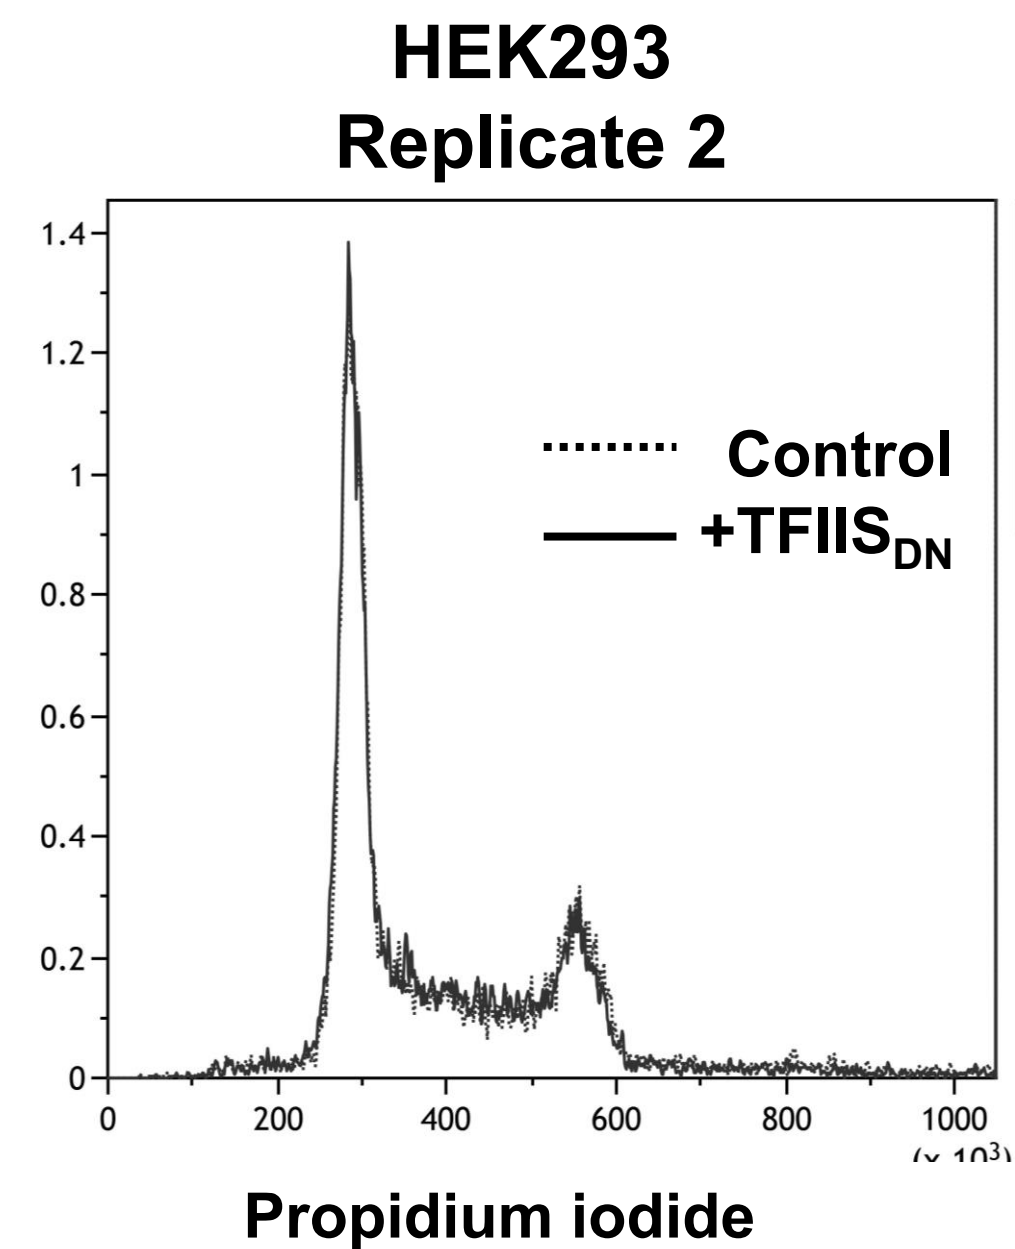**Fig. S1**

**Figure S1, related to Figure 1.**

(A) Sequence alignment of yeast, mouse, and human TFIIS. The motif that interacts with the pol II trigger loop and bridge helix is highlighted in yellow, with the residues mutated in TFIIS<sub>DN</sub> underlined.

(B) Anti-TFIIS (TCEA1) Western blot of HEK293 extracts before and shown after induction of TFIIS<sub>DN</sub> with 2 μg/ml doxycycline (+Dox) for 24 hrs. Two biological replicates are shown. CstF77 is a loading control. Note strong over-expression of TFIIS<sub>DN</sub> relative to endogenous TFIIS.

(C) Expression of TFIIS<sub>DN</sub> does not affect the cell cycle distribution as measured by propidium iodide flow cytometry. The fraction of cells in G1, S, and G2 phases of the cell cycle is shown before and after expression of TFIIS<sub>DN</sub> for 24 hours in HEK293 cells. The mean is shown for three biological replicates with the error bars representing the SEM (left). The cell cycle distribution is shown before and after expression of TFIIS<sub>DN</sub> for two biological replicates. Cells were incubated in Krishan stain for 72 hours before performing flow cytometry.

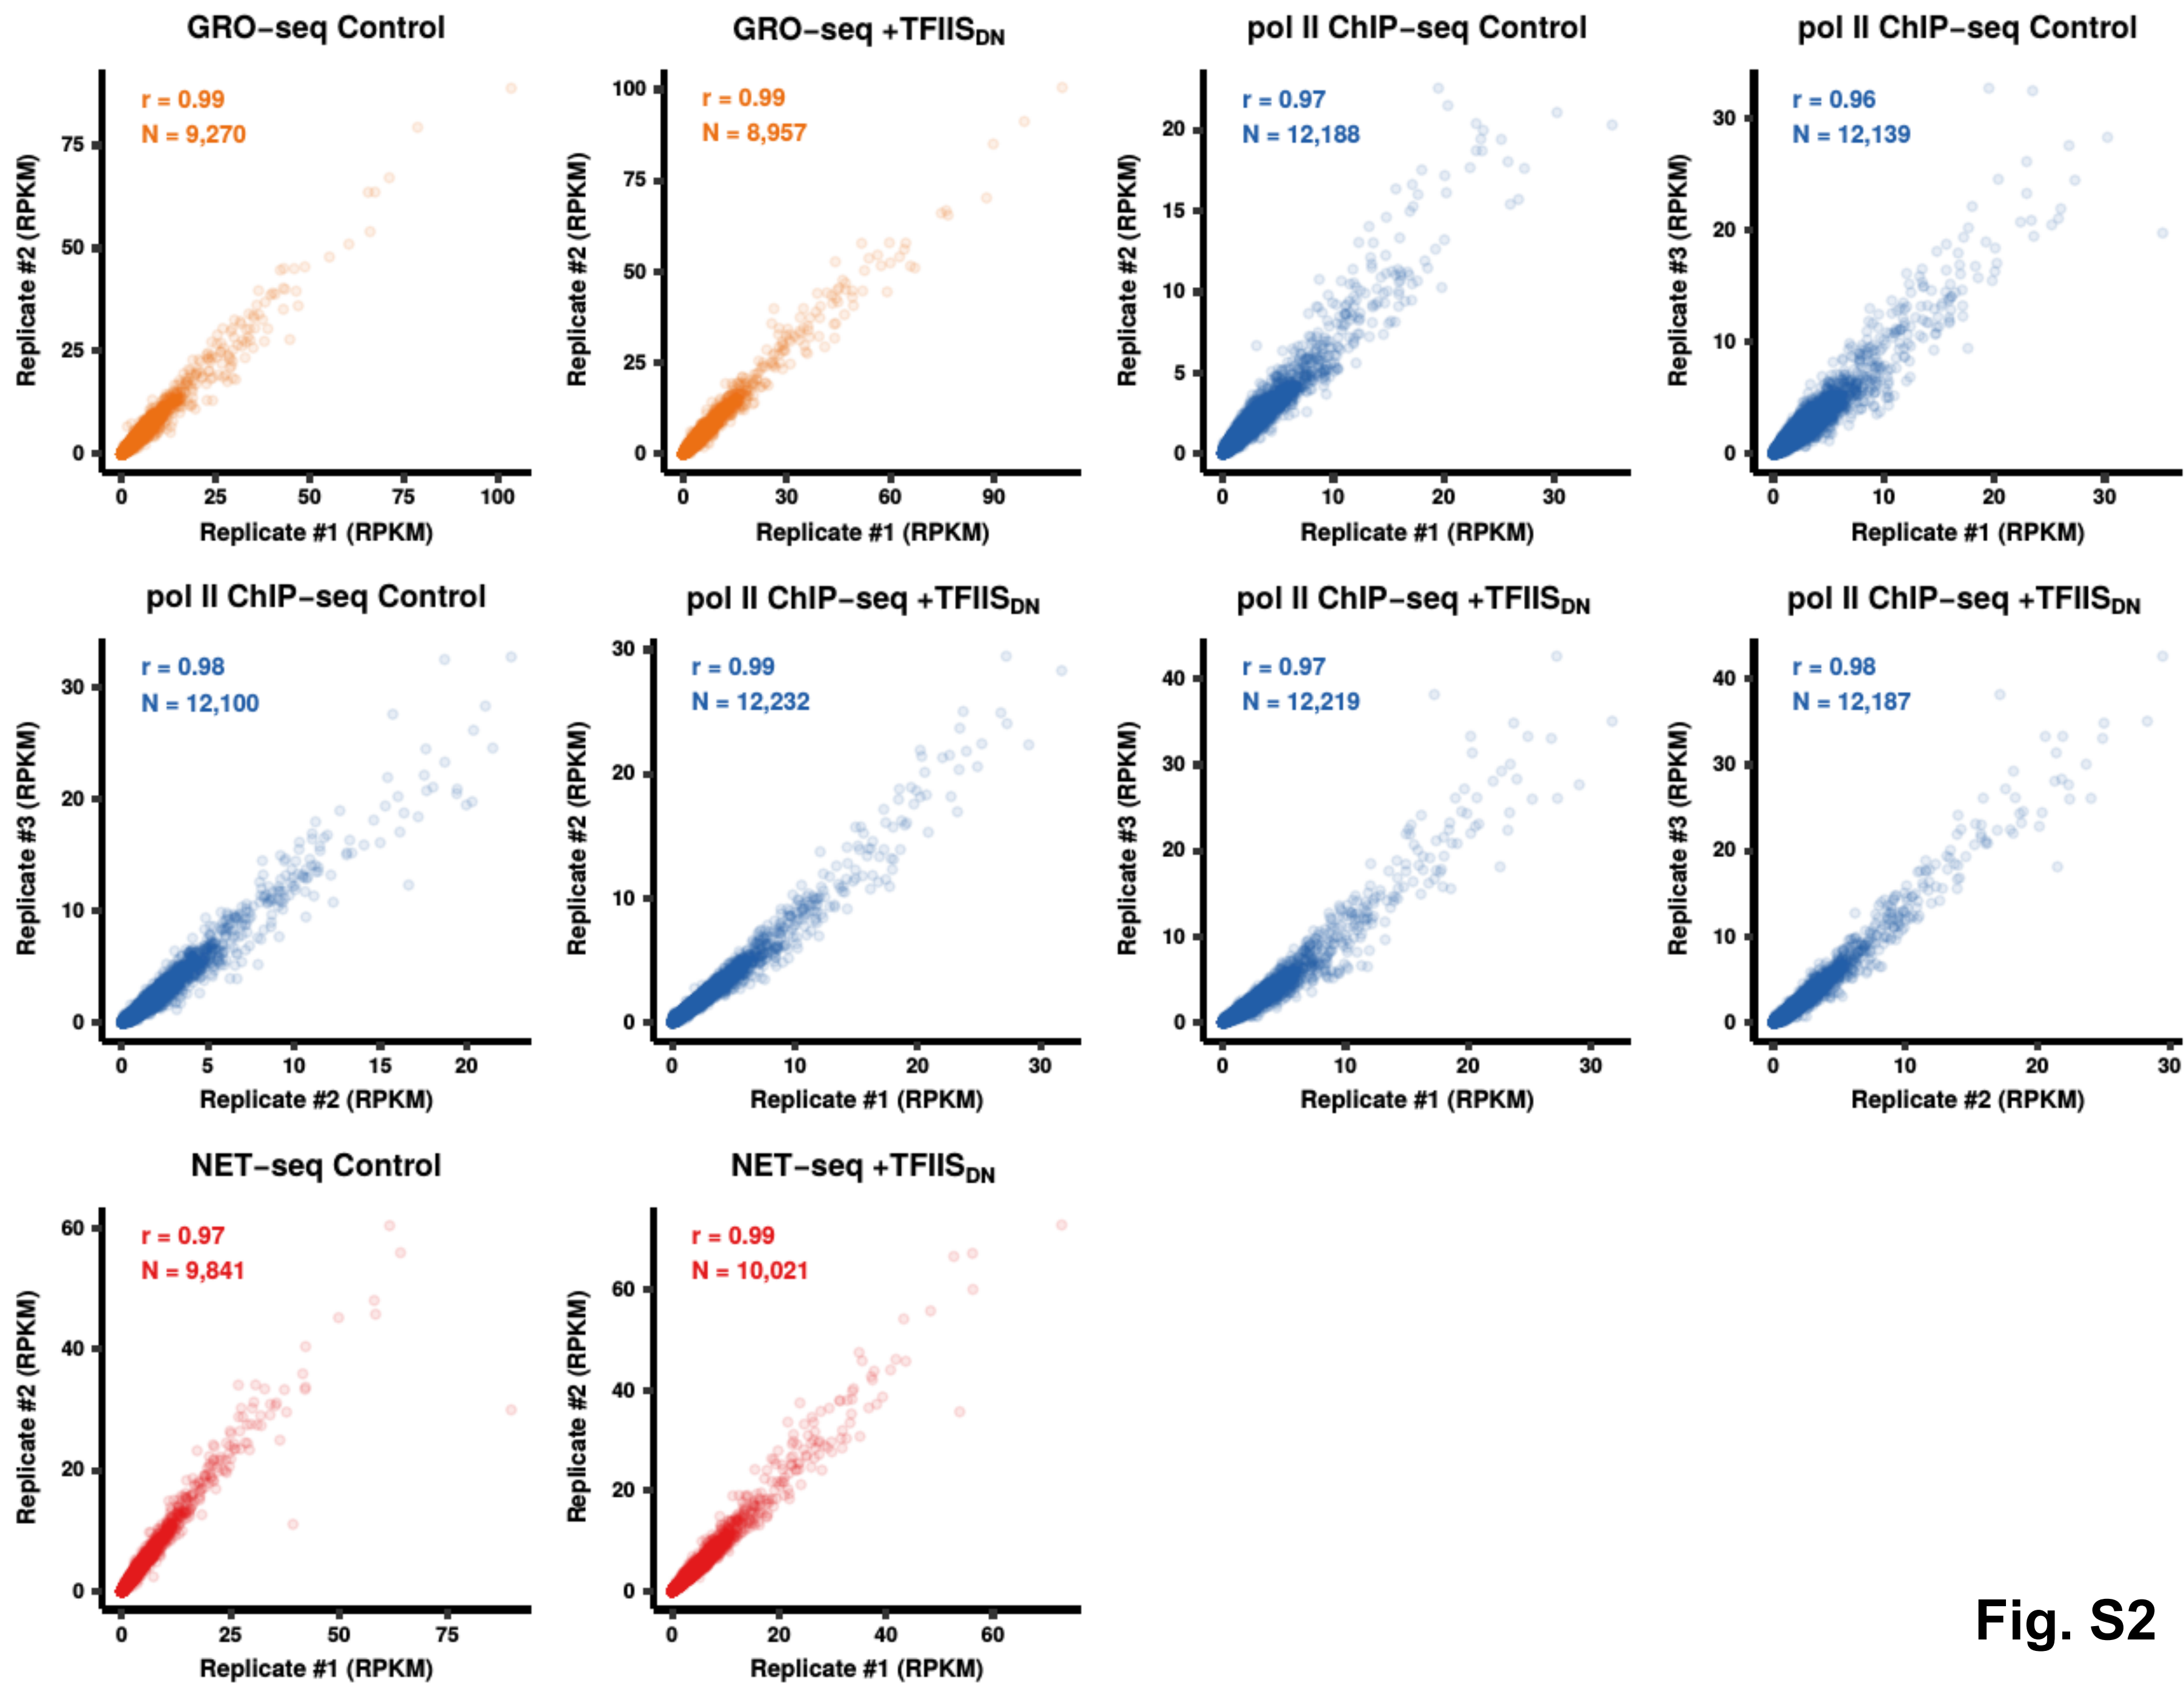

Fig. S2

**Figure S2, related to figures 1 and 2.**

Scatter plots comparing the signal within each gene for each biological replicate used in Fig 1.

Genes are included that are >1 kb long, separated by >2 kb, have at least one mapped read and are present in both datasets being compared. The Pearson correlation coefficient is shown.

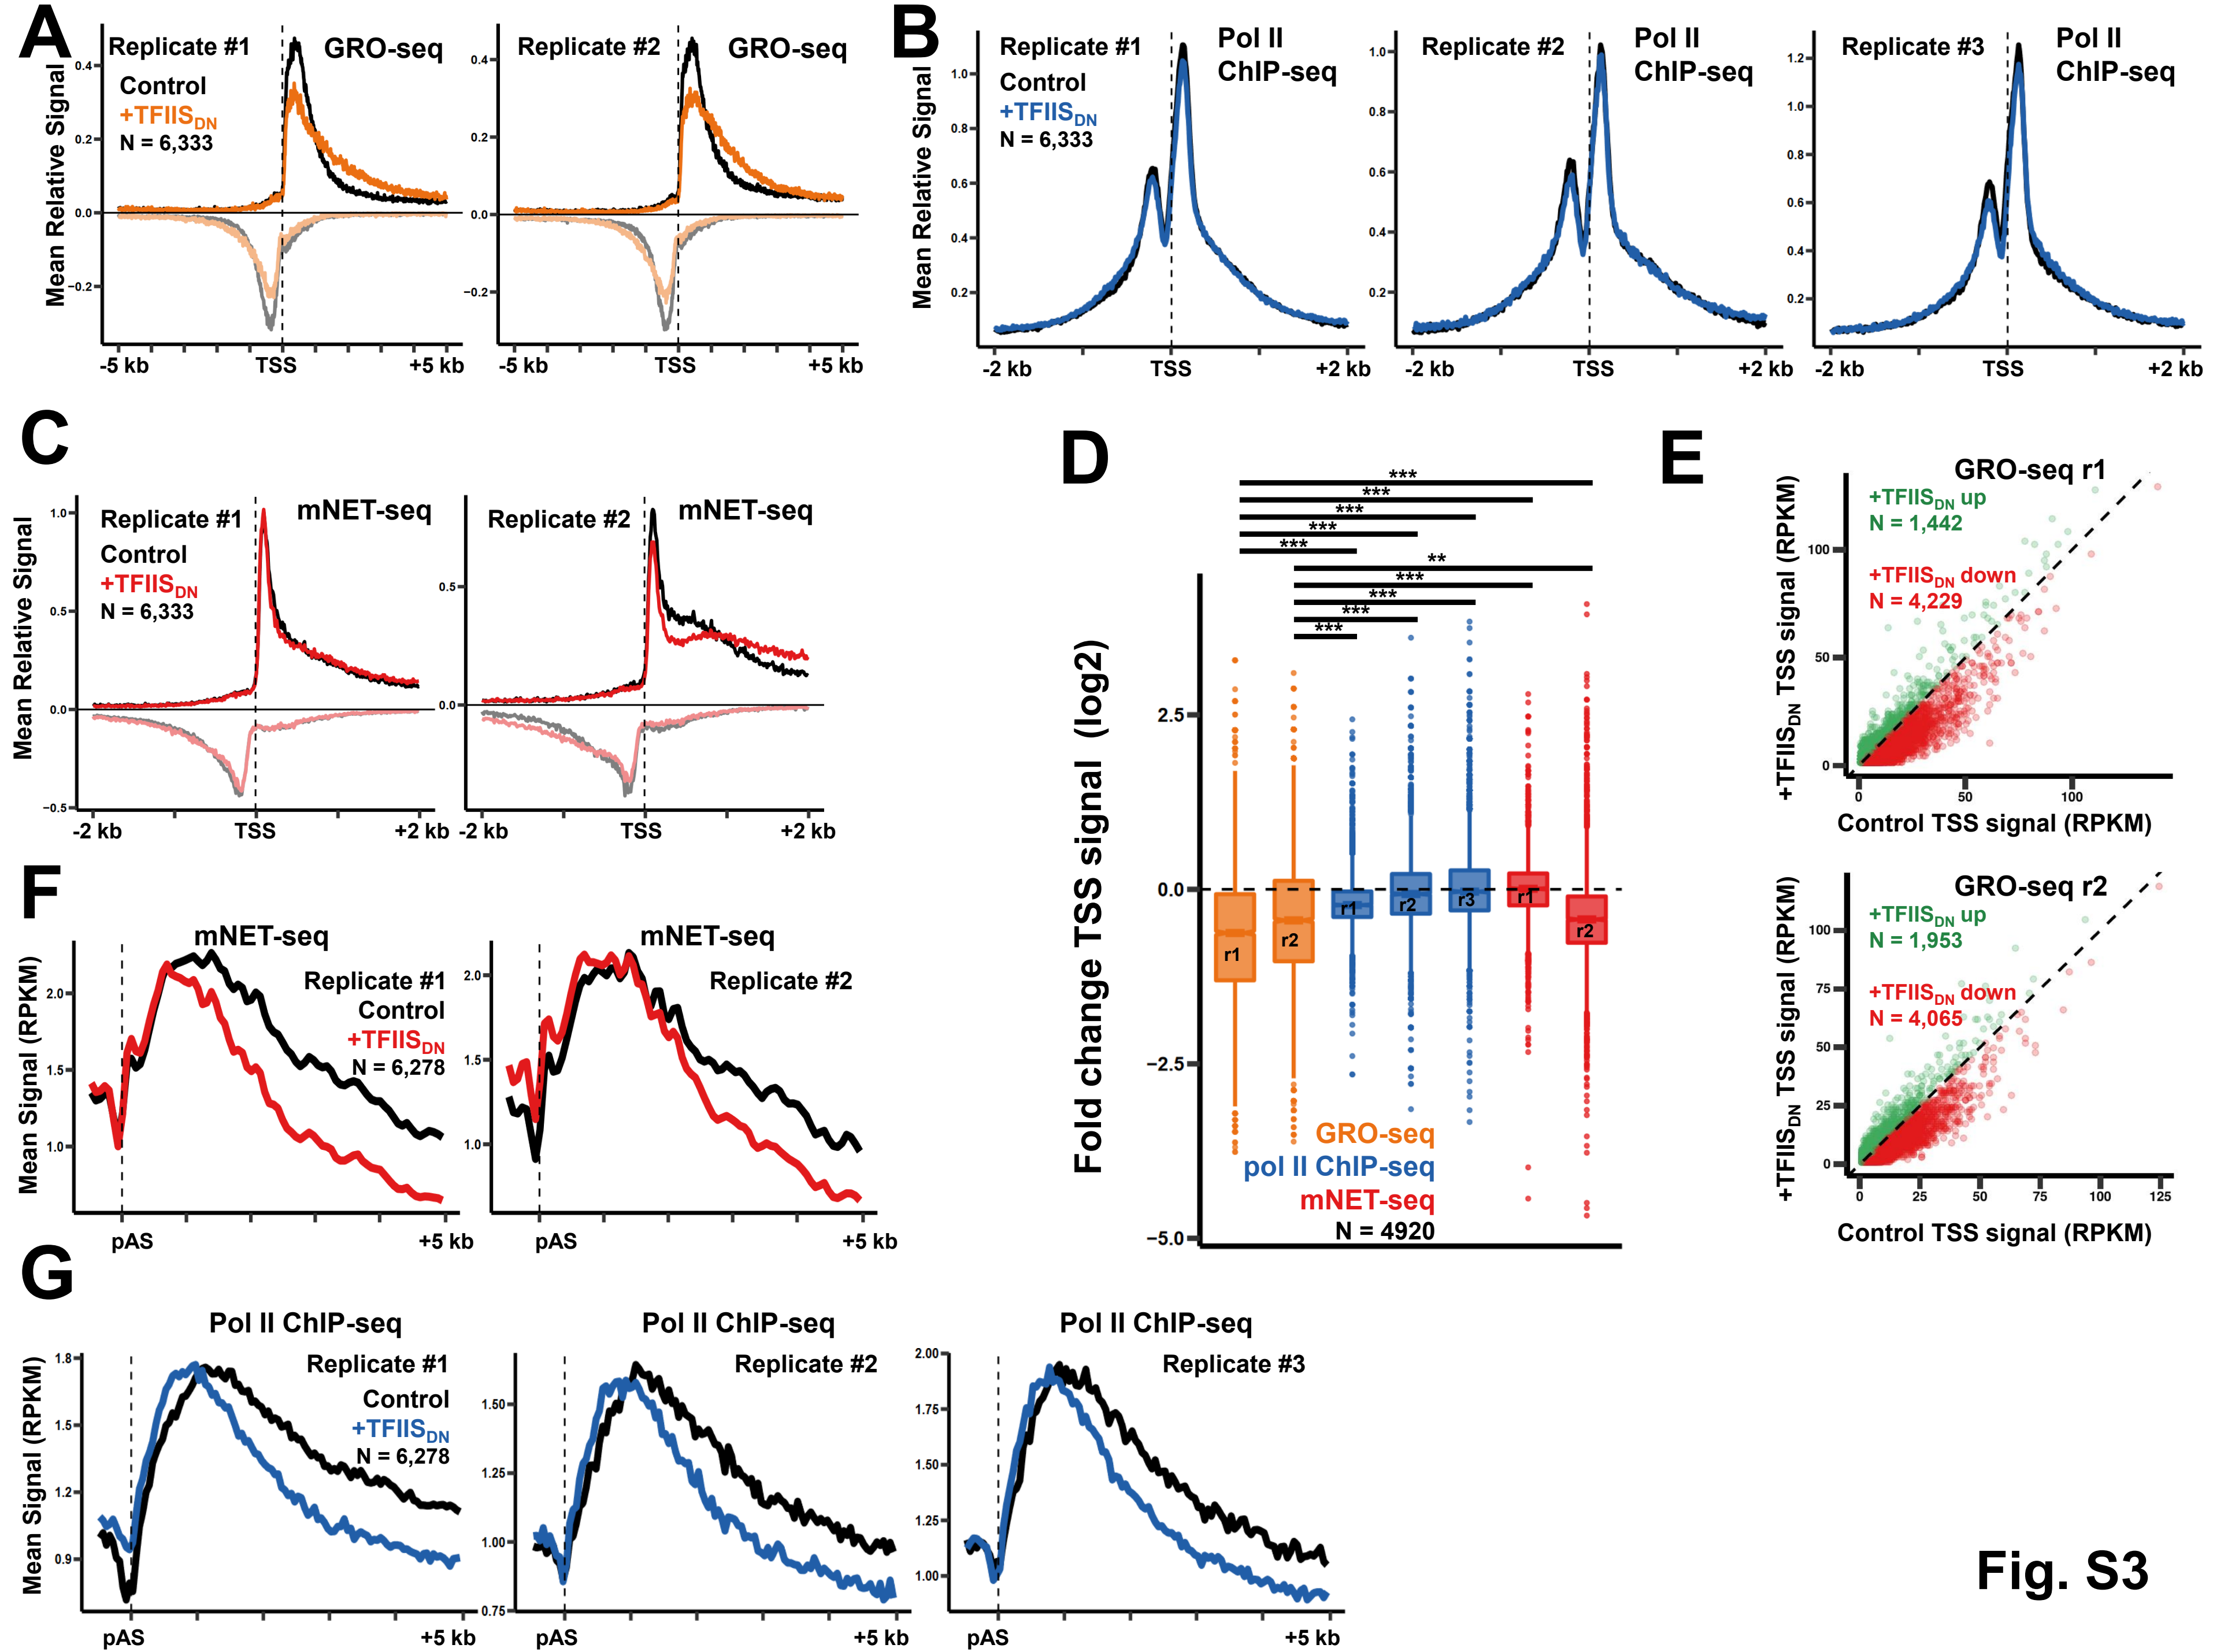

**Fig. S3**

**Figure S3, related to figures 1 and 2.**

(A) Metaplots of relative GRO-seq signals (10 bp bins) for each biological replicate used in Fig. 1A for genes >5 kb long and >2kb separated. The relative signal for each gene was calculated by dividing the signal in each bin by the total signal within the region plotted. The relative signal was then averaged across the plotted genes. Negative values correspond to anti-sense signal.

(B) Metaplots of relative pol II ChIP-seq signals as in B for each biological replicate used in Fig. 1B.

(C) Metaplots of relative pol II mNET-seq signals as in B for each biological replicate used in Fig. 1C.

(D) Comparison of the fold change in GRO-seq, pol II ChIP-seq, and mNET-seq signal after expression of TFIIS<sub>DN</sub> for the region from the TSS to +300 bp for each biological replicate used in Fig. 1D for genes >1 kb long and separated by >2 kb. \*\*  $p < 0.01$ , \*\*\*  $p < 10^{-3}$  Welch two sample t-test, corrected for multiple testing using the Bonferroni-Holm method.

(E) Most genes show a reduction in GRO-seq signal in the region downstream of the TSS. Scatter plots comparing GRO-seq signal in the region from the TSS to +300 bp downstream for uninduced cells and cells expressing TFIIS<sub>DN</sub>. Genes are shown that are >1 kb long, >2 kb separated, contain at least one mapped read in the region, and are present in both datasets.

(F) Metaplots of mNET-seq signals (50 bp bins) for each biological replicate used in Fig. 2D. Data were plotted for genes >1 kb long and separated by >5 kb.

(G) Metaplots of pol II ChIP-seq signals (50 bp bins) for each biological replicate used in Fig. 2B for genes shown in F.

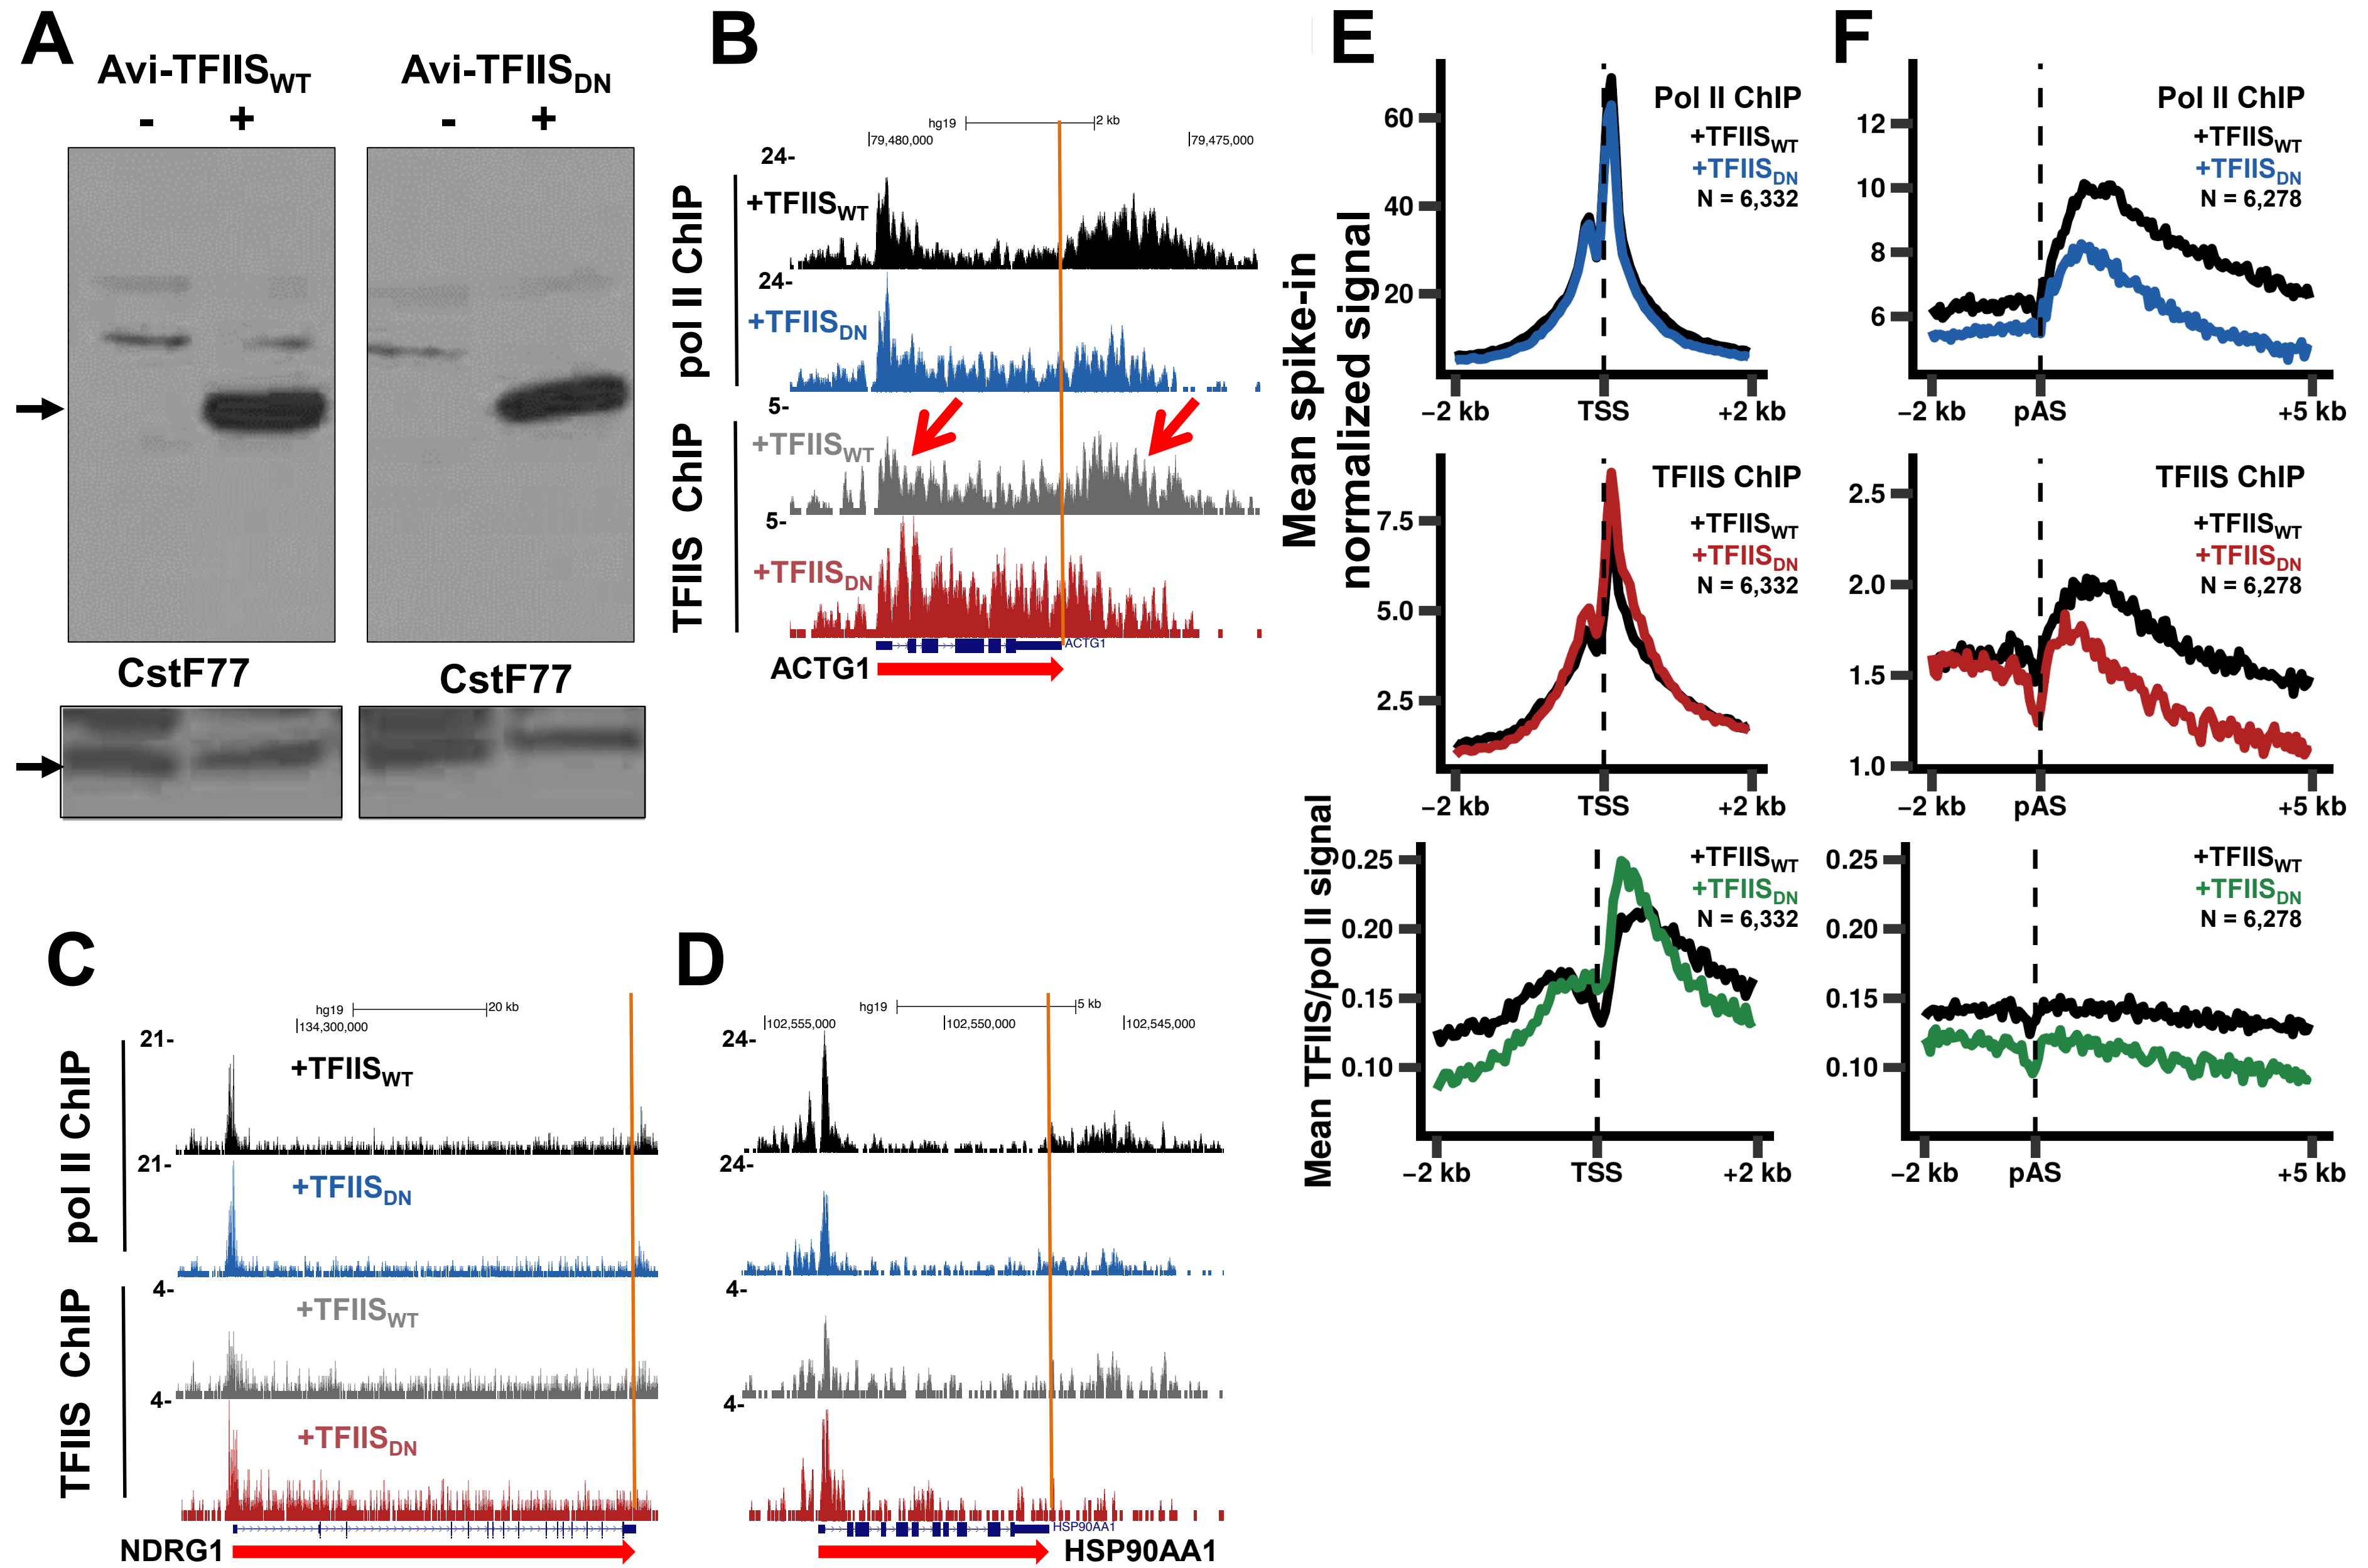

Fig. S4

**Figure S4, related to figures 1 and 2.**

(A) Western blot of epitope tagged TFIIIS<sub>WT</sub> and TFIIIS<sub>DN</sub> with rabbit anti-Avi-tag antibody before and after induction of HMLE-RAS pCW57bla-TFIIIS<sub>WT</sub> and -TFIIIS<sub>DN</sub> cells with 2 µg /ml doxycycline for 24 hrs.

(B-D) UCSC genome browser screen shots of anti-pol II (pan CTD) and anti TFIIIS (Avitag) ChIP-seq signals in HMLE-RAS pCW57bla-TFIIIS<sub>WT</sub> and -TFIIIS<sub>DN</sub> cells induced with 2 µg /ml doxycycline for 24 hrs. Signals were normalized relative to a spike-in of yeast extract expressing Avi-tagged Rpb3 which reacts with both anti-pol II (pan CTD) and anti-Avitag antibodies.

(E) TFIIIS<sub>DN</sub> associates with pol II near the TSS in a similar manner as wild type TFIIIS. Metaplots (50 bp bins) showing quantitative ChIP-seq signal for pol II (anti-pan CTD) and TFIIIS (anti-Avi-tag) for the region around the TSS after expression of either TFIIIS<sub>WT</sub> or TFIIIS<sub>DN</sub> (upper and middle panels). A spike-in of yeast extract expressing Avi-tagged Rpb3 which reacts with both anti-pol II CTD and anti-Avi-tag antibodies was used to normalize anti-pol II and anti-TFIIIS signals for genes shown in Fig. 1F. Average TFIIIS/pol II ratios are shown in the lower panel. TFIIIS/pol II ratios were calculated for each gene before averaging across all plotted genes.

(F) TFIIIS<sub>DN</sub> associates with pol II near the poly(A) site in a similar manner as wild type TFIIIS. Metaplots (50 bp bins) showing quantitative ChIP-seq signal for pol II and TFIIIS as in A for the region around the poly(A) site for genes shown in Fig. 2E. Average TFIIIS/pol II ratios are shown in the lower panel as in A.



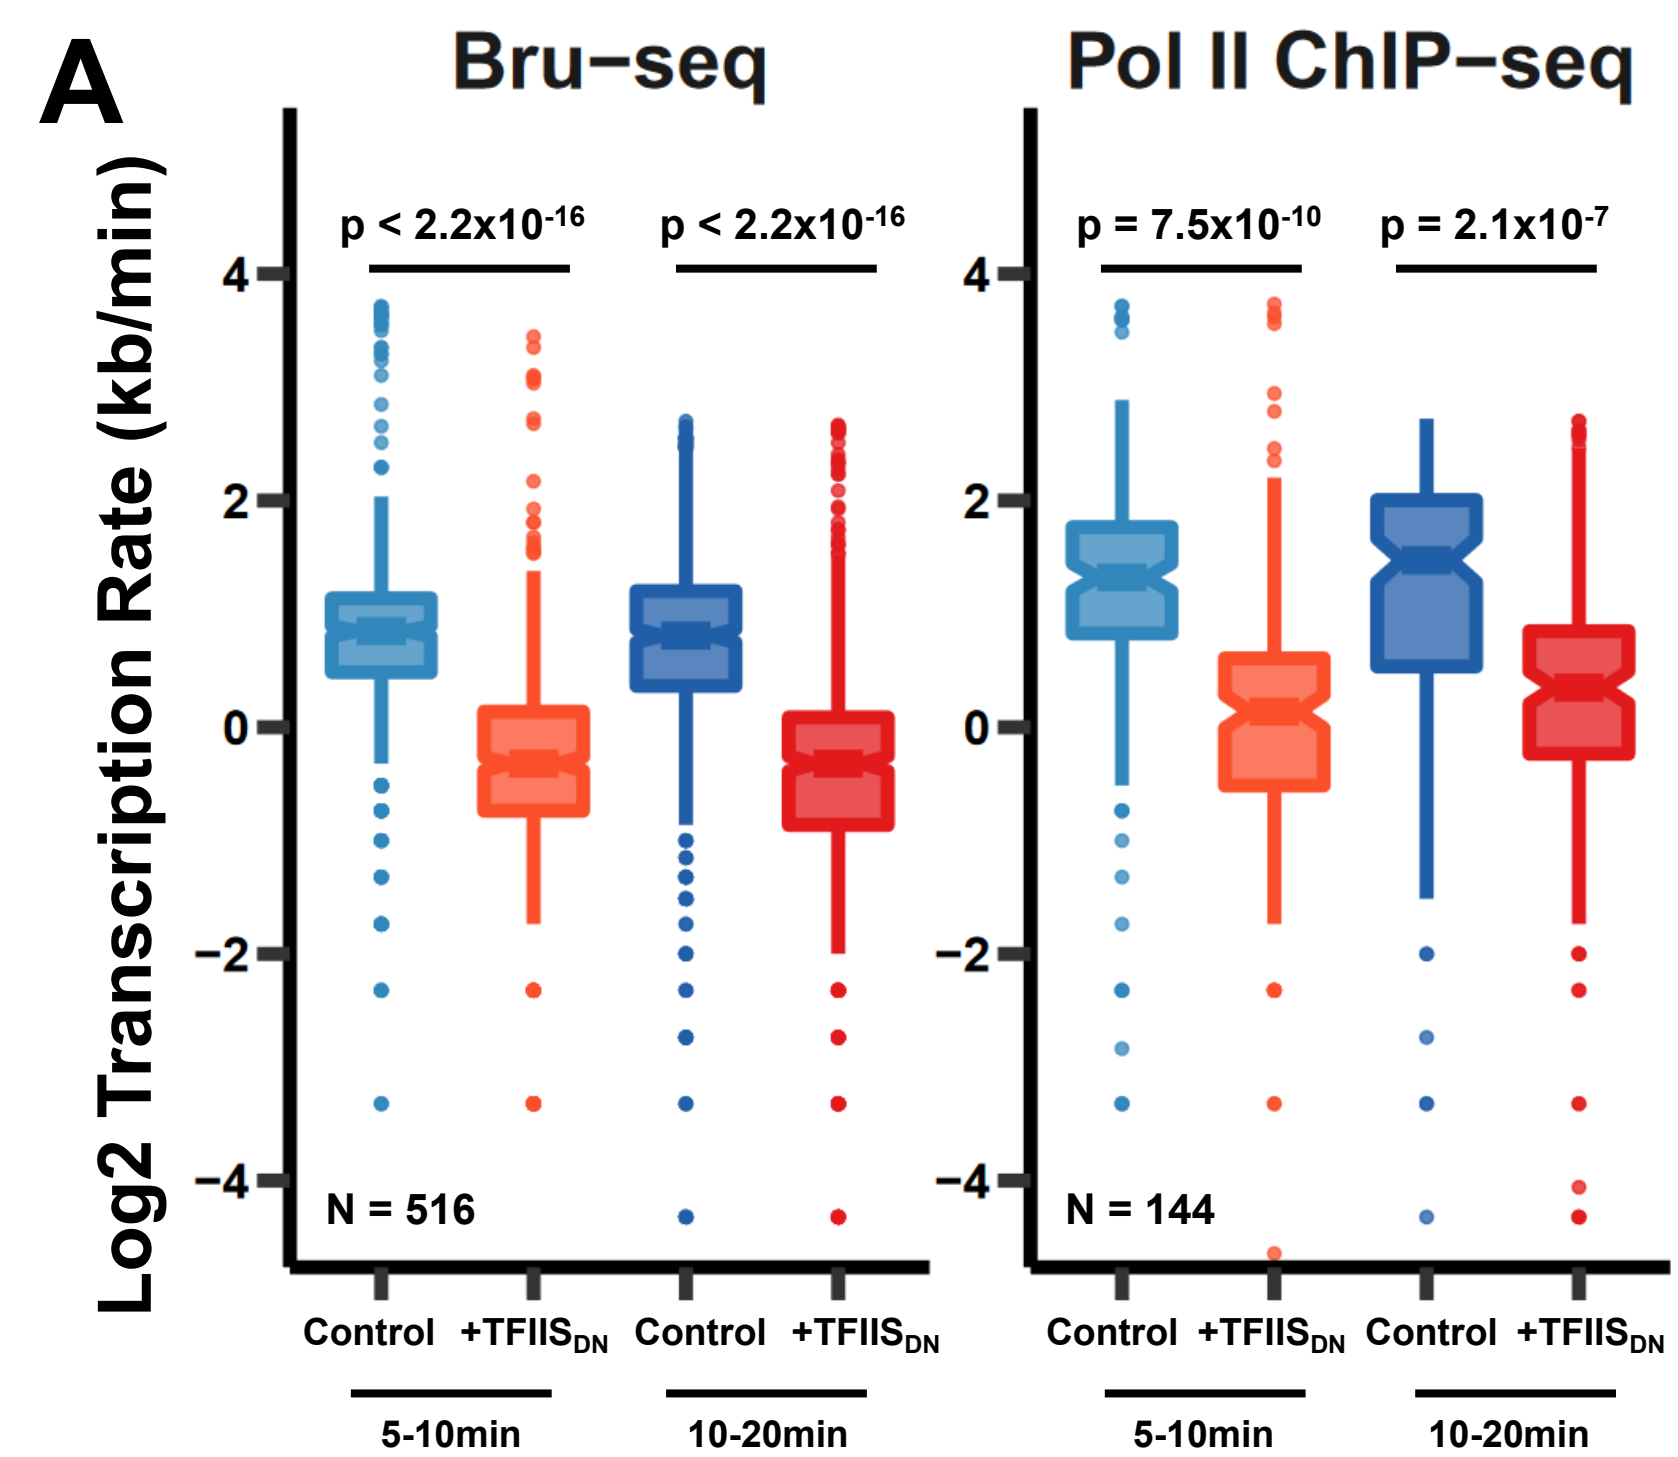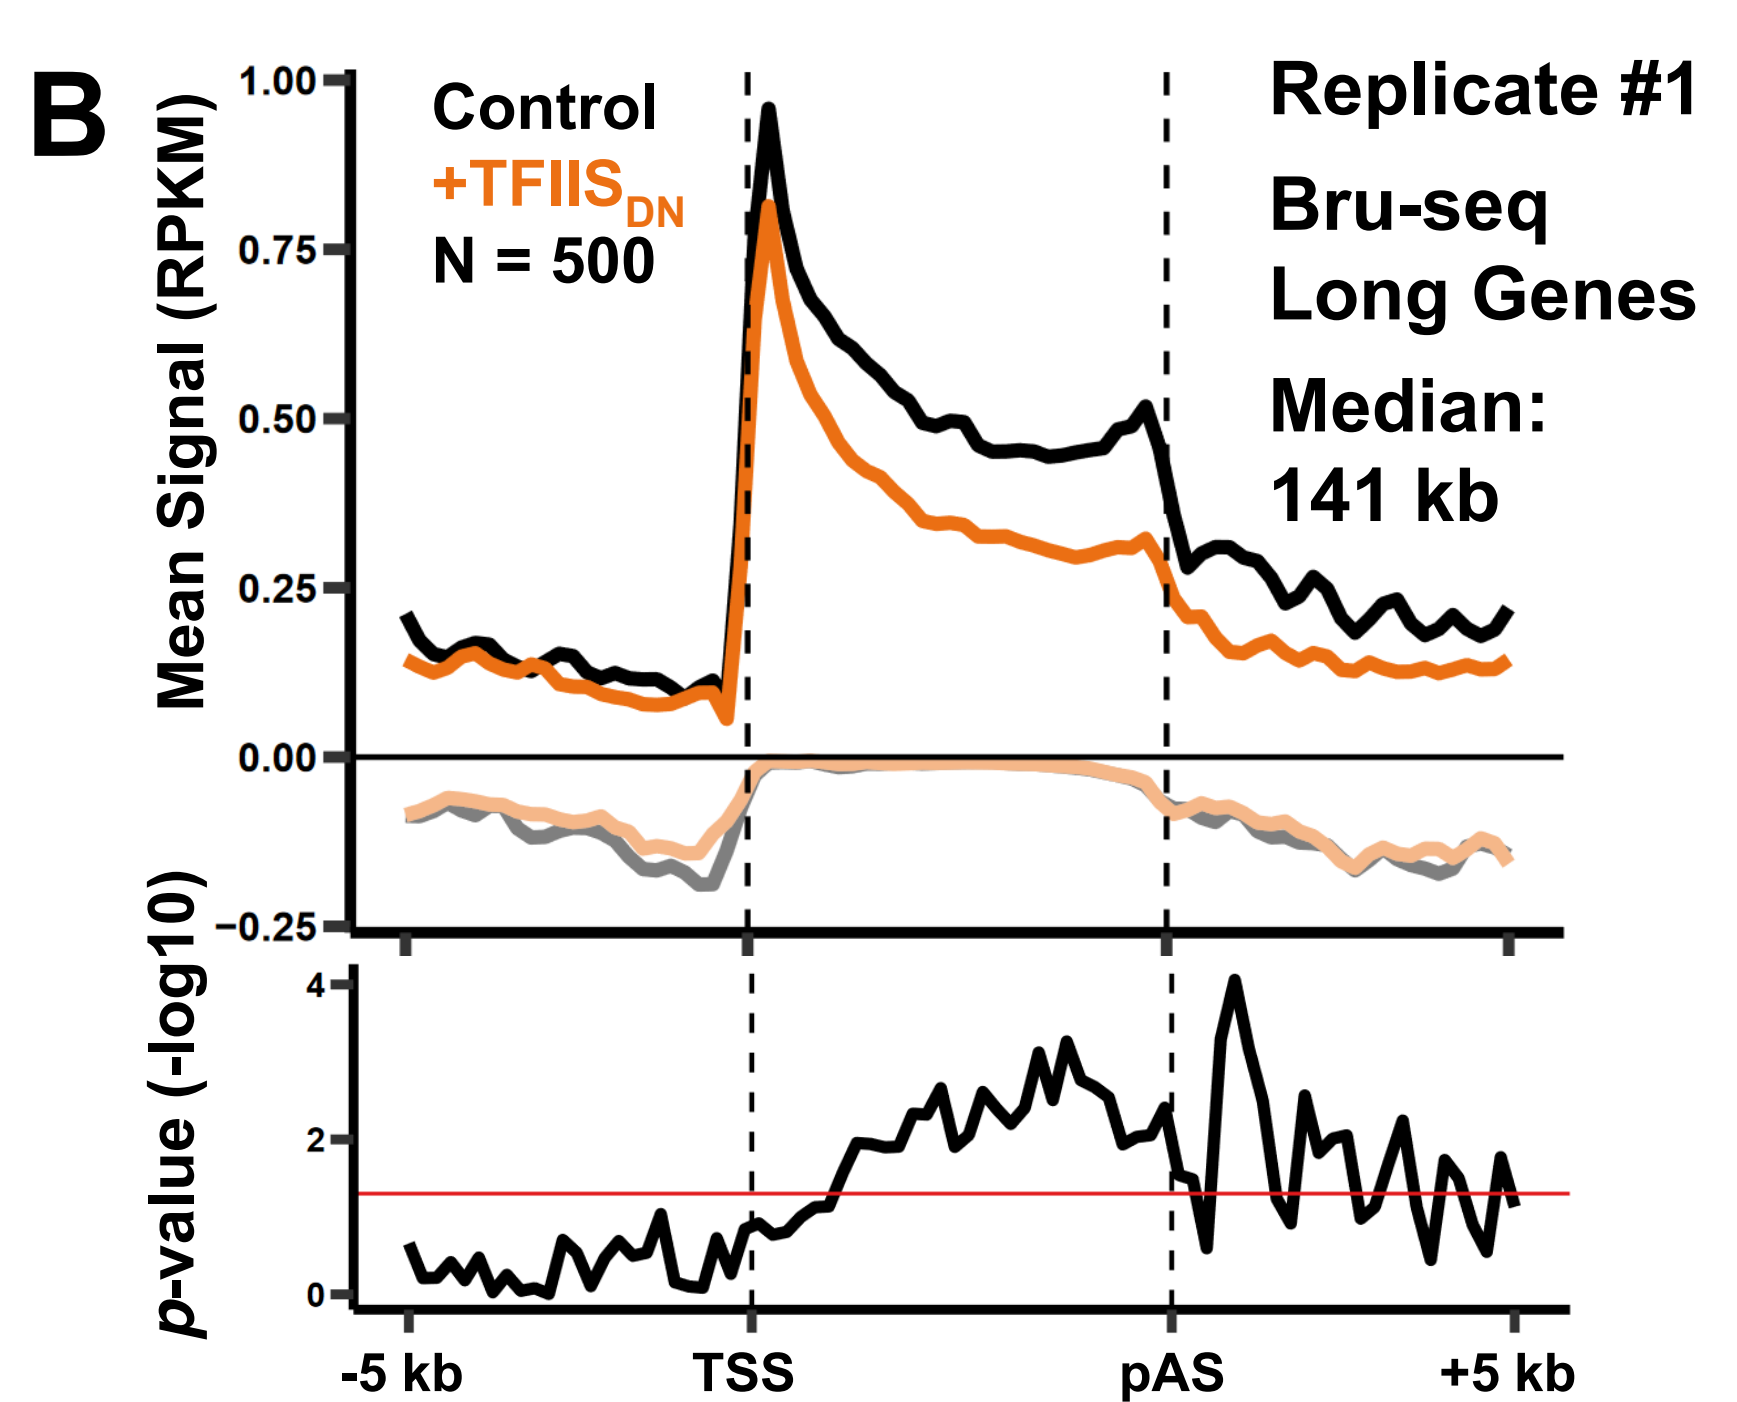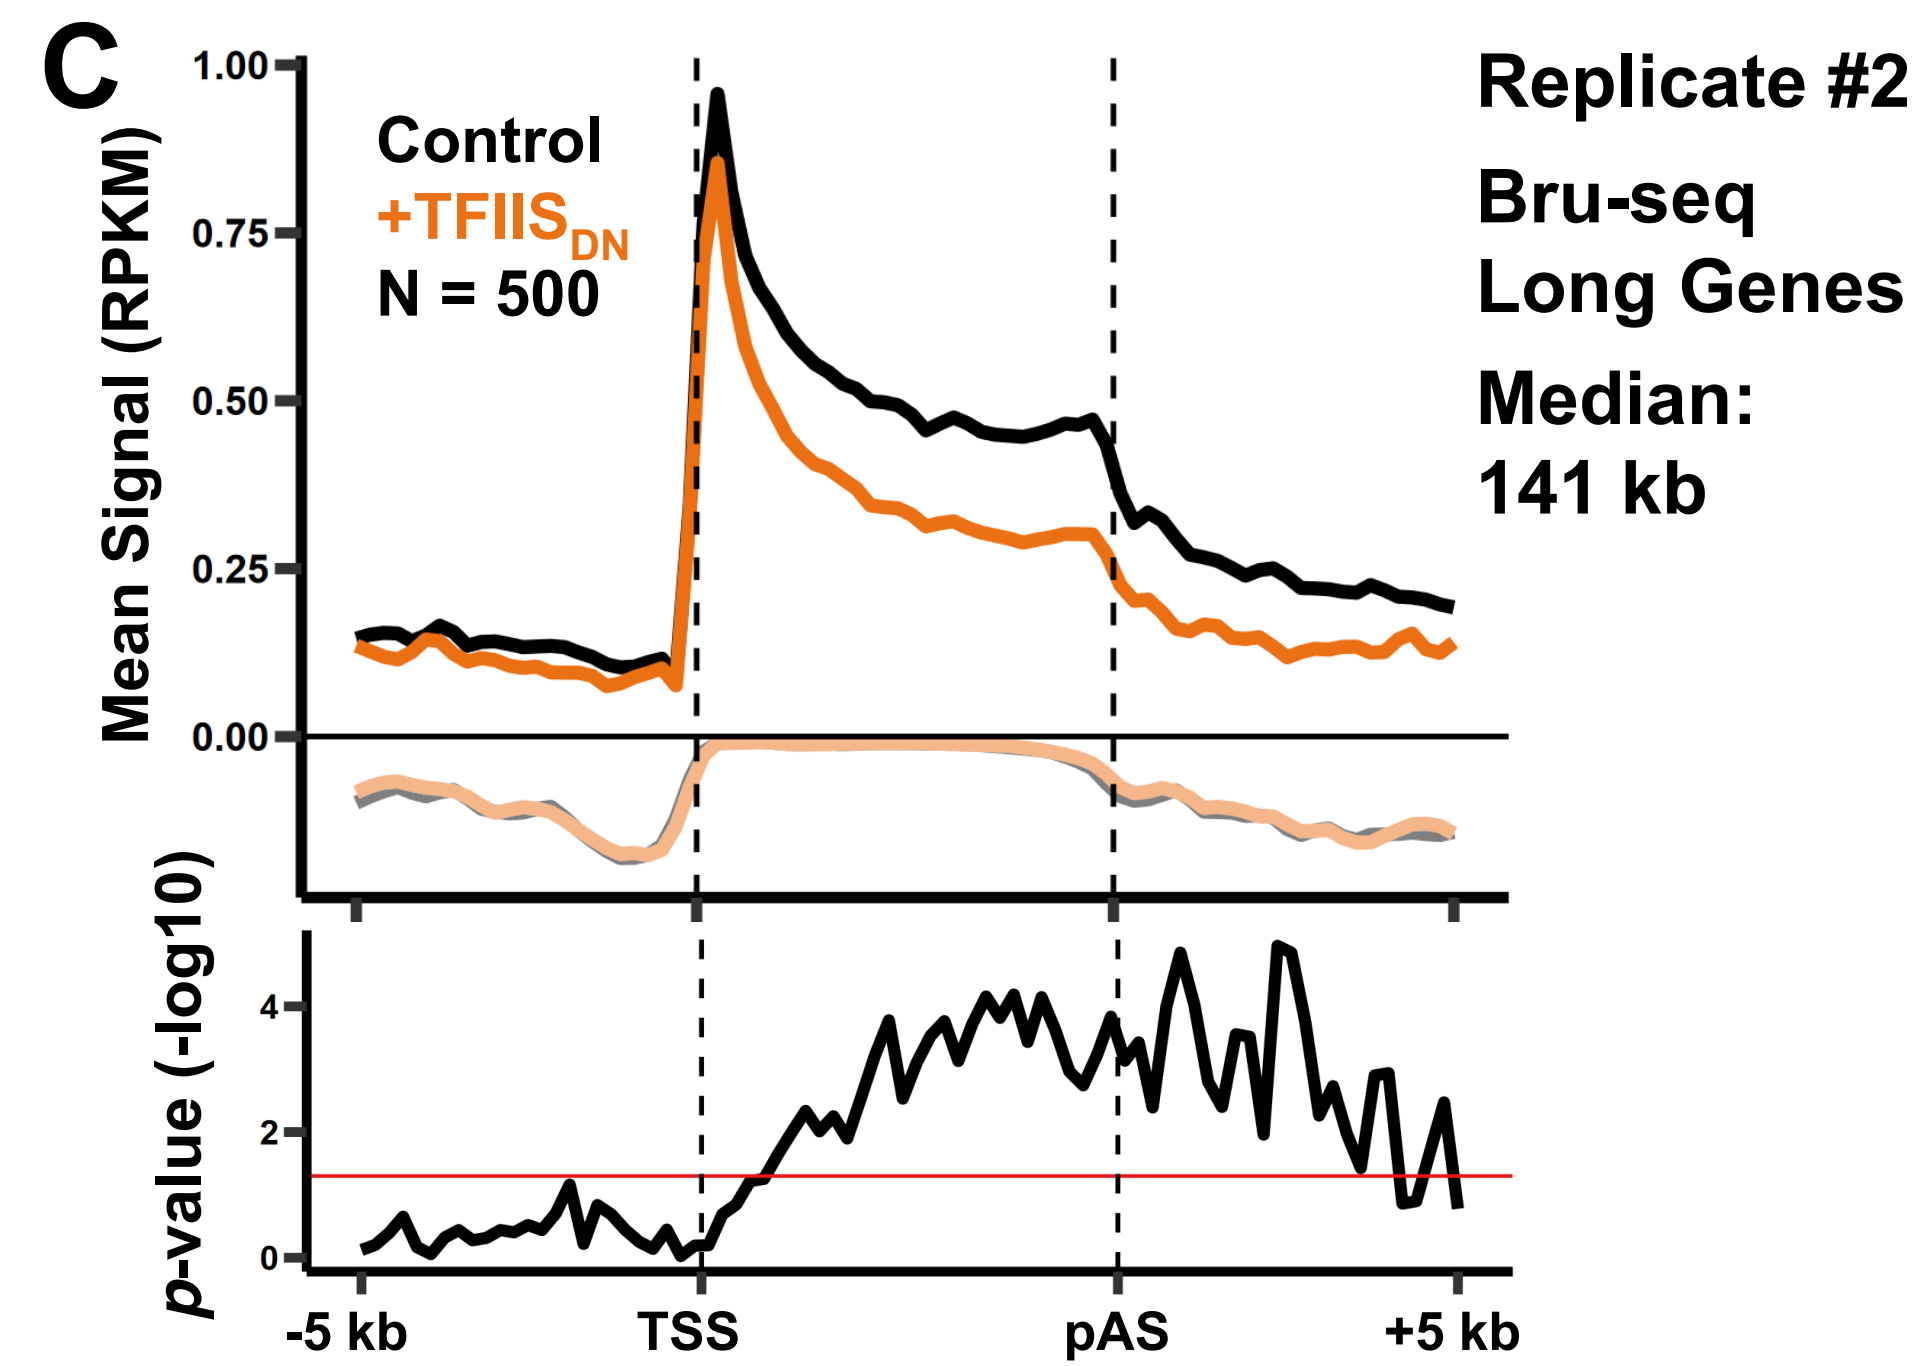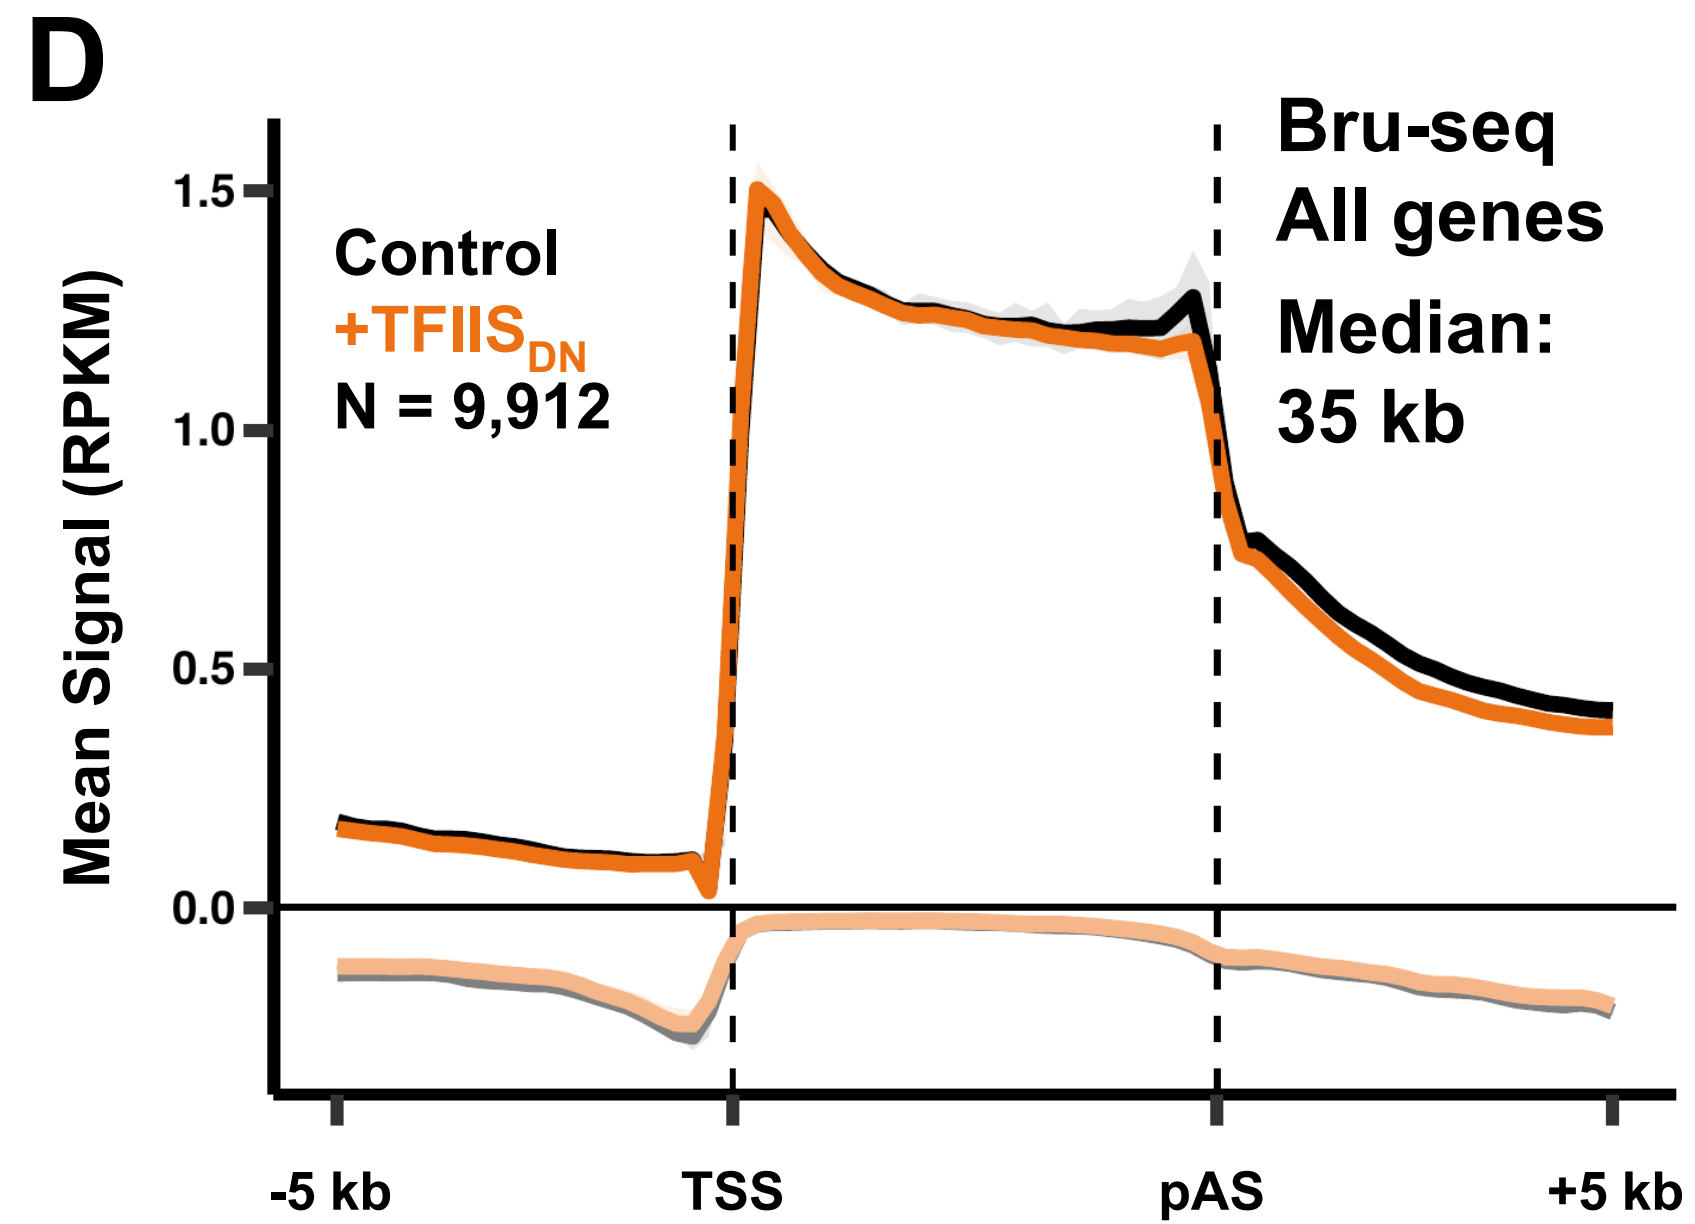

**Fig. S5**

**Figure S5, related to figure 3.**

(A) Transcription rates were calculated using Bru-seq data shown in Fig. 3A (left panel) or pol II ChIP-seq data shown in Fig. 3B (right panel) for uninduced and TFIIS<sub>DN</sub>-expressing cells by comparing the 5 min and 10 min or 10 min and 20 min timepoints after DRB removal.

(B, C) Metaplots of Bru-seq signals for uninduced and TFIIS<sub>DN</sub>-expressing cells for each biological replicate used in Fig. 3E. Data were plotted for 200bp bins for the regions from -5 kb to the TSS and from the poly(A) site to +5 kb downstream, and 30 bins of variable length for the region from the TSS to the poly(A) site. Negative values correspond to anti-sense signal. Genes from the 3<sup>rd</sup> and 4<sup>th</sup> quartiles from Fig. 3D are plotted. p-values were calculated by comparing the signals for uninduced and TFIIS<sub>DN</sub>-expressing cells at each bin using the Welch two sample t-test (bottom panel).

(D) Metaplots of Bru-seq signals for genes >1 kb long and >2 kb separated. The mean signal was calculated for each bin for each individual replicate. The mean signal was then averaged for the replicates and plotted, with the shaded region representing the SEM for two biological replicates. Negative values correspond to anti-sense signal.

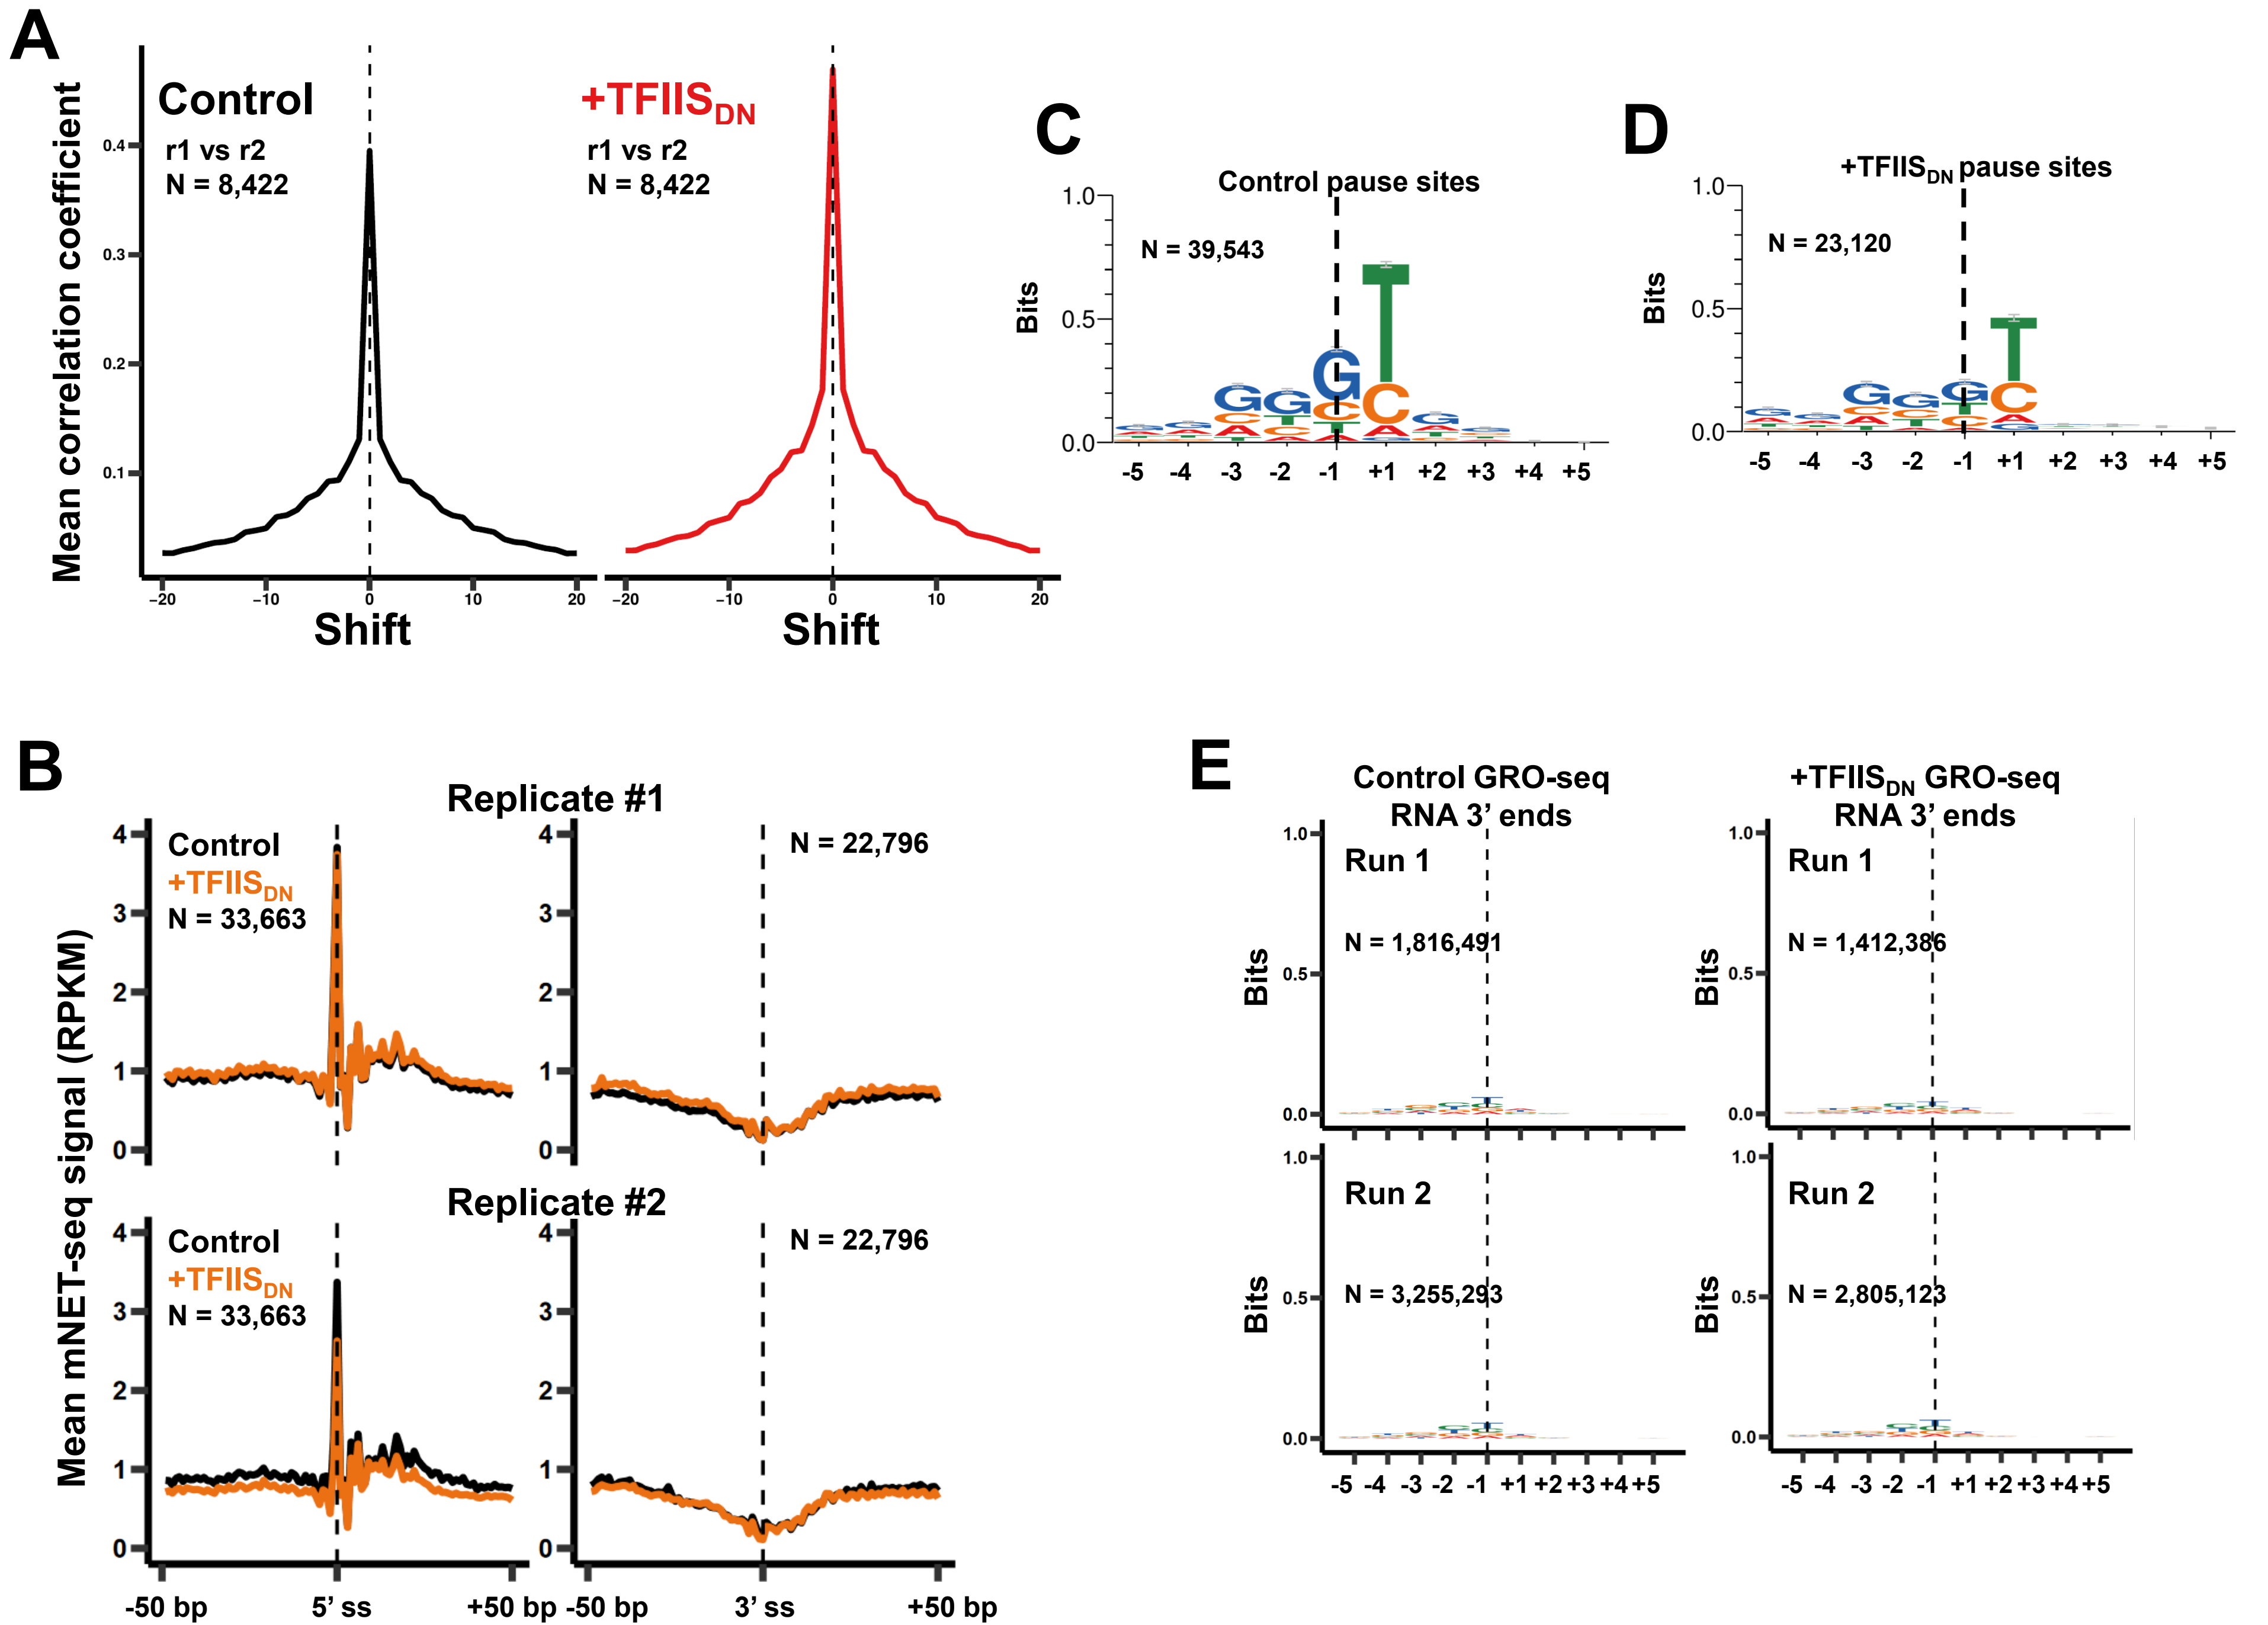

Fig. S6

**Figure S6, related to figure 4.**

(A) Mean cross-correlation between replicate mNET-seq datasets for genes containing at least one pause site shown in Fig 4E. The analysis was performed by calculating the Pearson's correlation coefficient for each gene after shifting one of the datasets by the amount indicated on the x-axis. The correlation coefficients were then averaged over the entire gene list.

(B) Metaplots of mNET-seq signals around 5' and 3' splice sites (ss, 1 bp bins) for each biological replicate used in Fig. 4C for non-overlapping genes >1 kb long.

(C) Sequence logo generated using WebLogo 3 (<http://weblogo.threeplusone.com/create.cgi>) to include error bars for pause sites shown in Fig. 4D and E.

(D) Sequence logos for the region surrounding pauses identified in both +TFIIS<sub>DN</sub> datasets and absent in both uninduced datasets.

(E) Sequence logos for the region surrounding mapped RNA 3' ends from uninduced and +TFIIS<sub>DN</sub> GRO-seq libraries that were prepared using the same library prep protocol used to generate mNET-seq libraries. Only reads that were long enough to include a 3' adapter and that mapped to positions separated by at least 10 bp were included in the analysis.

**A**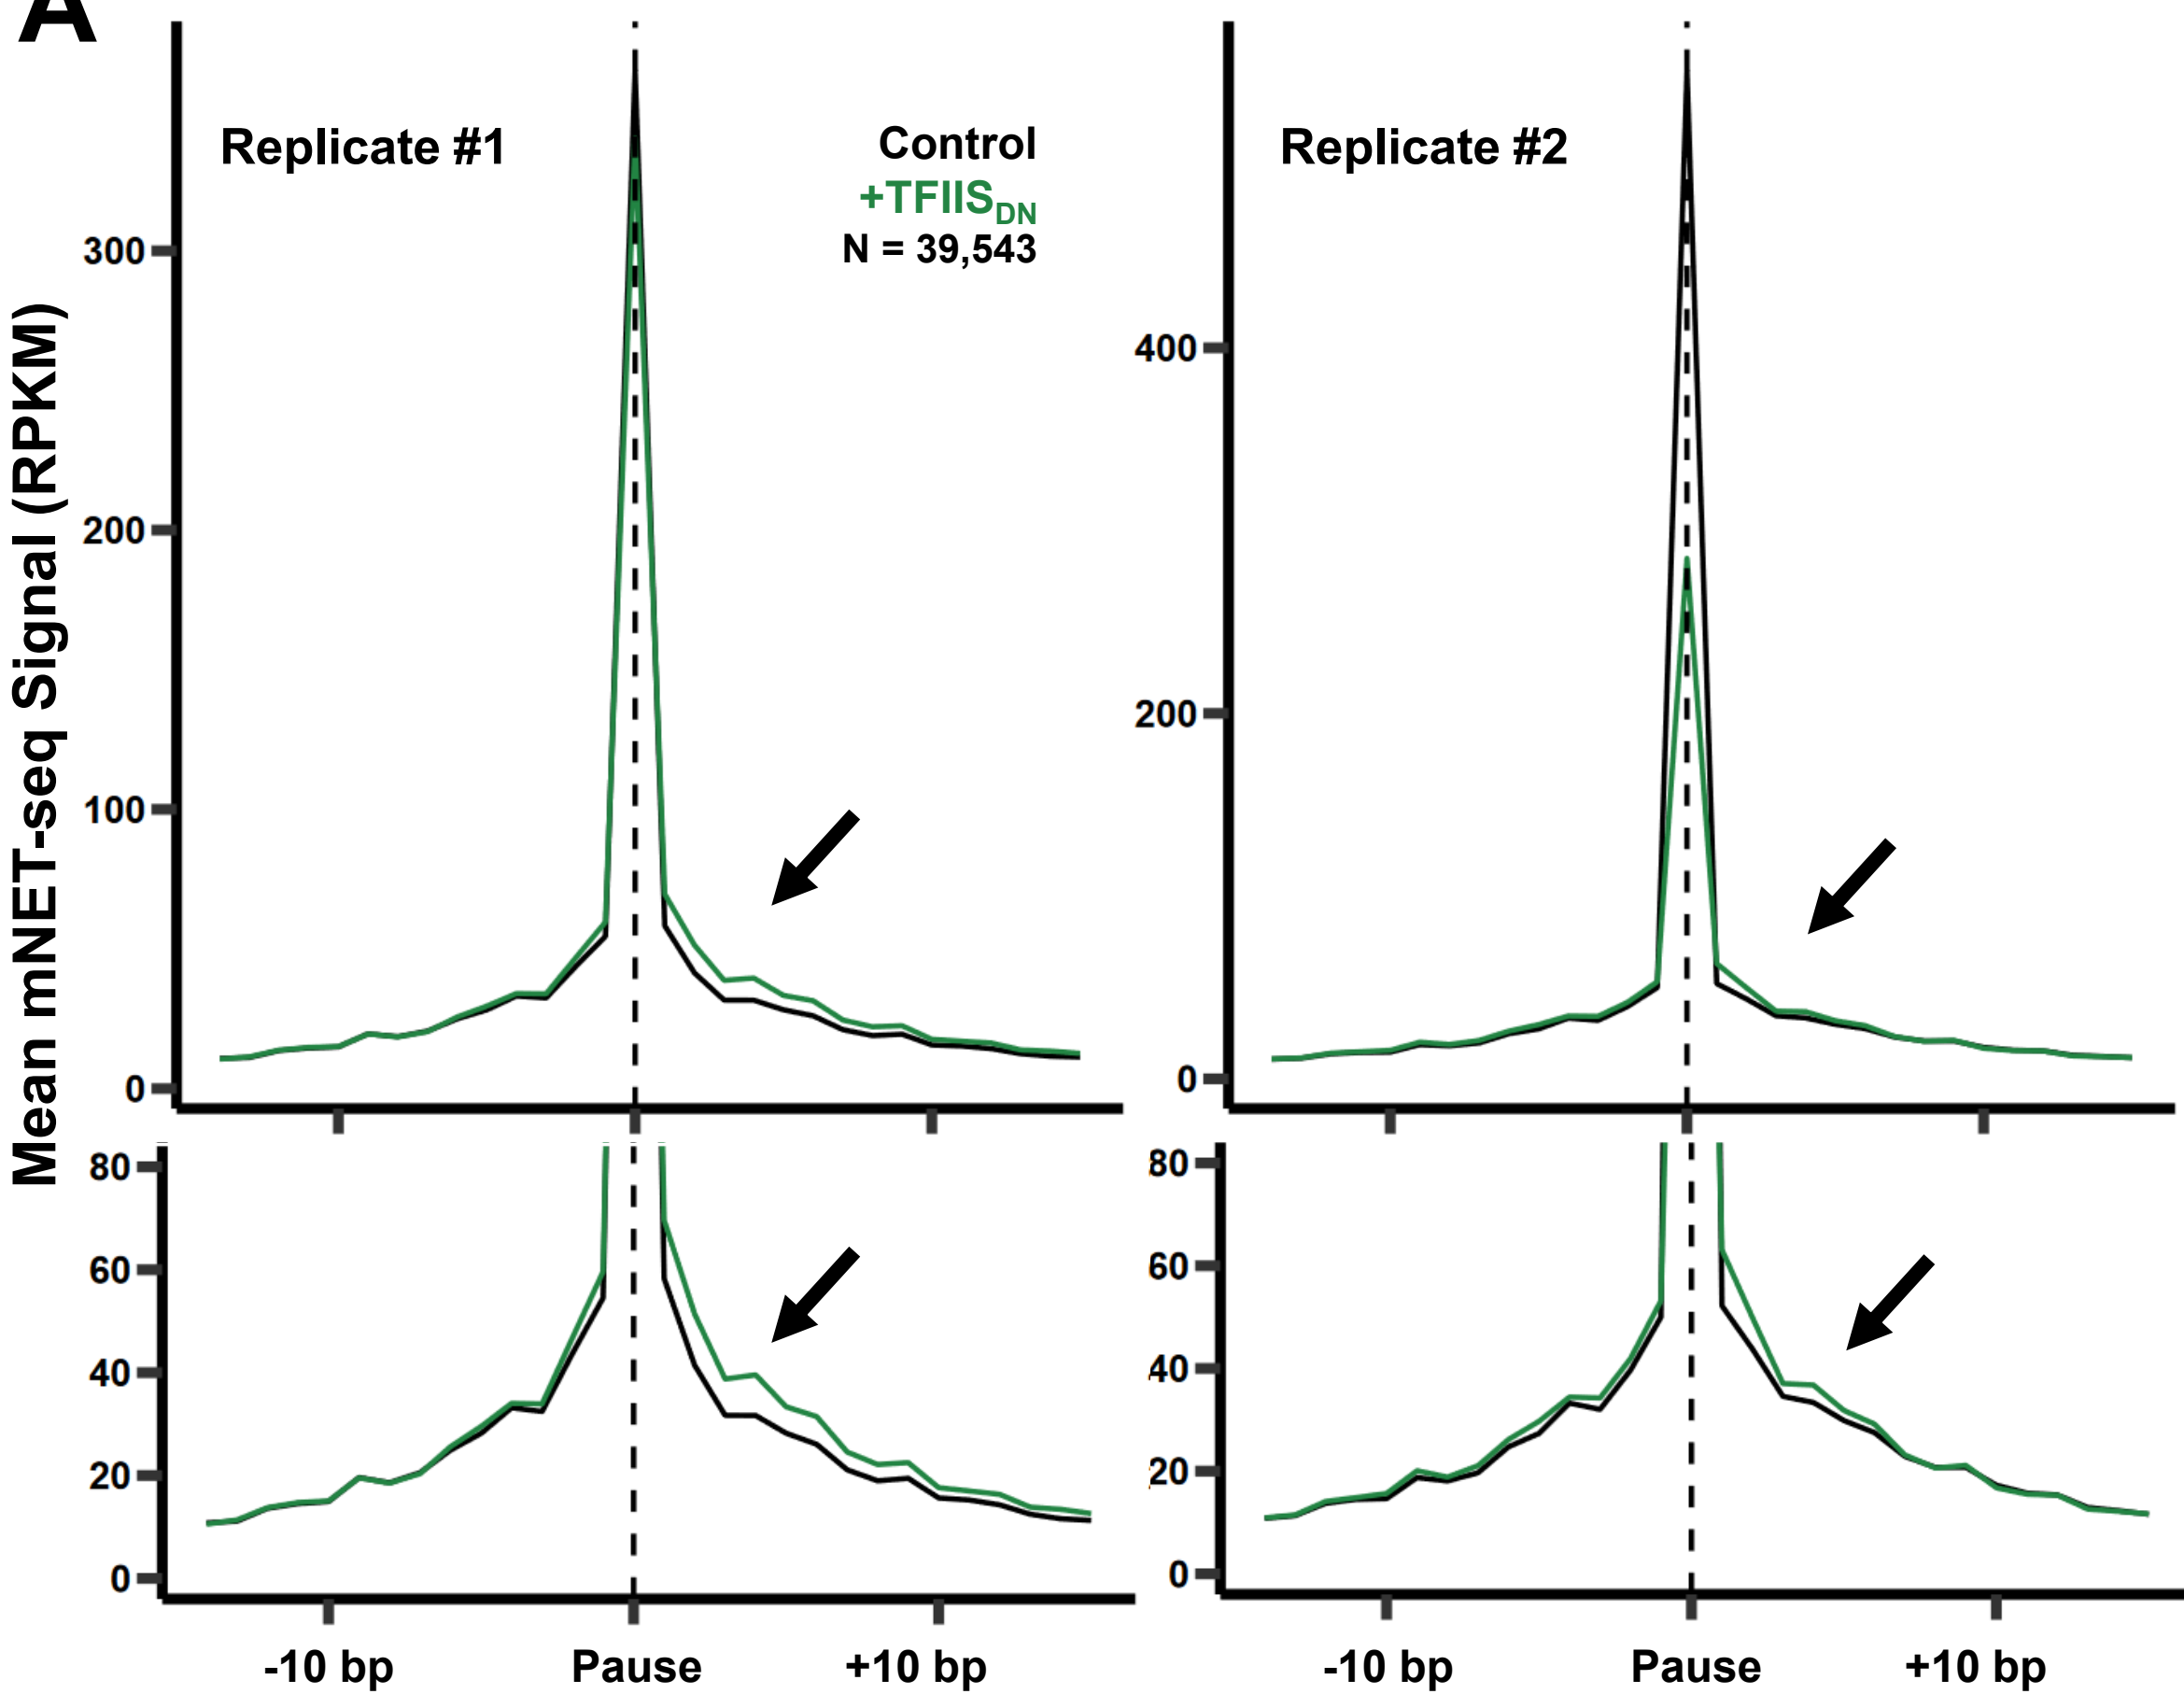**B**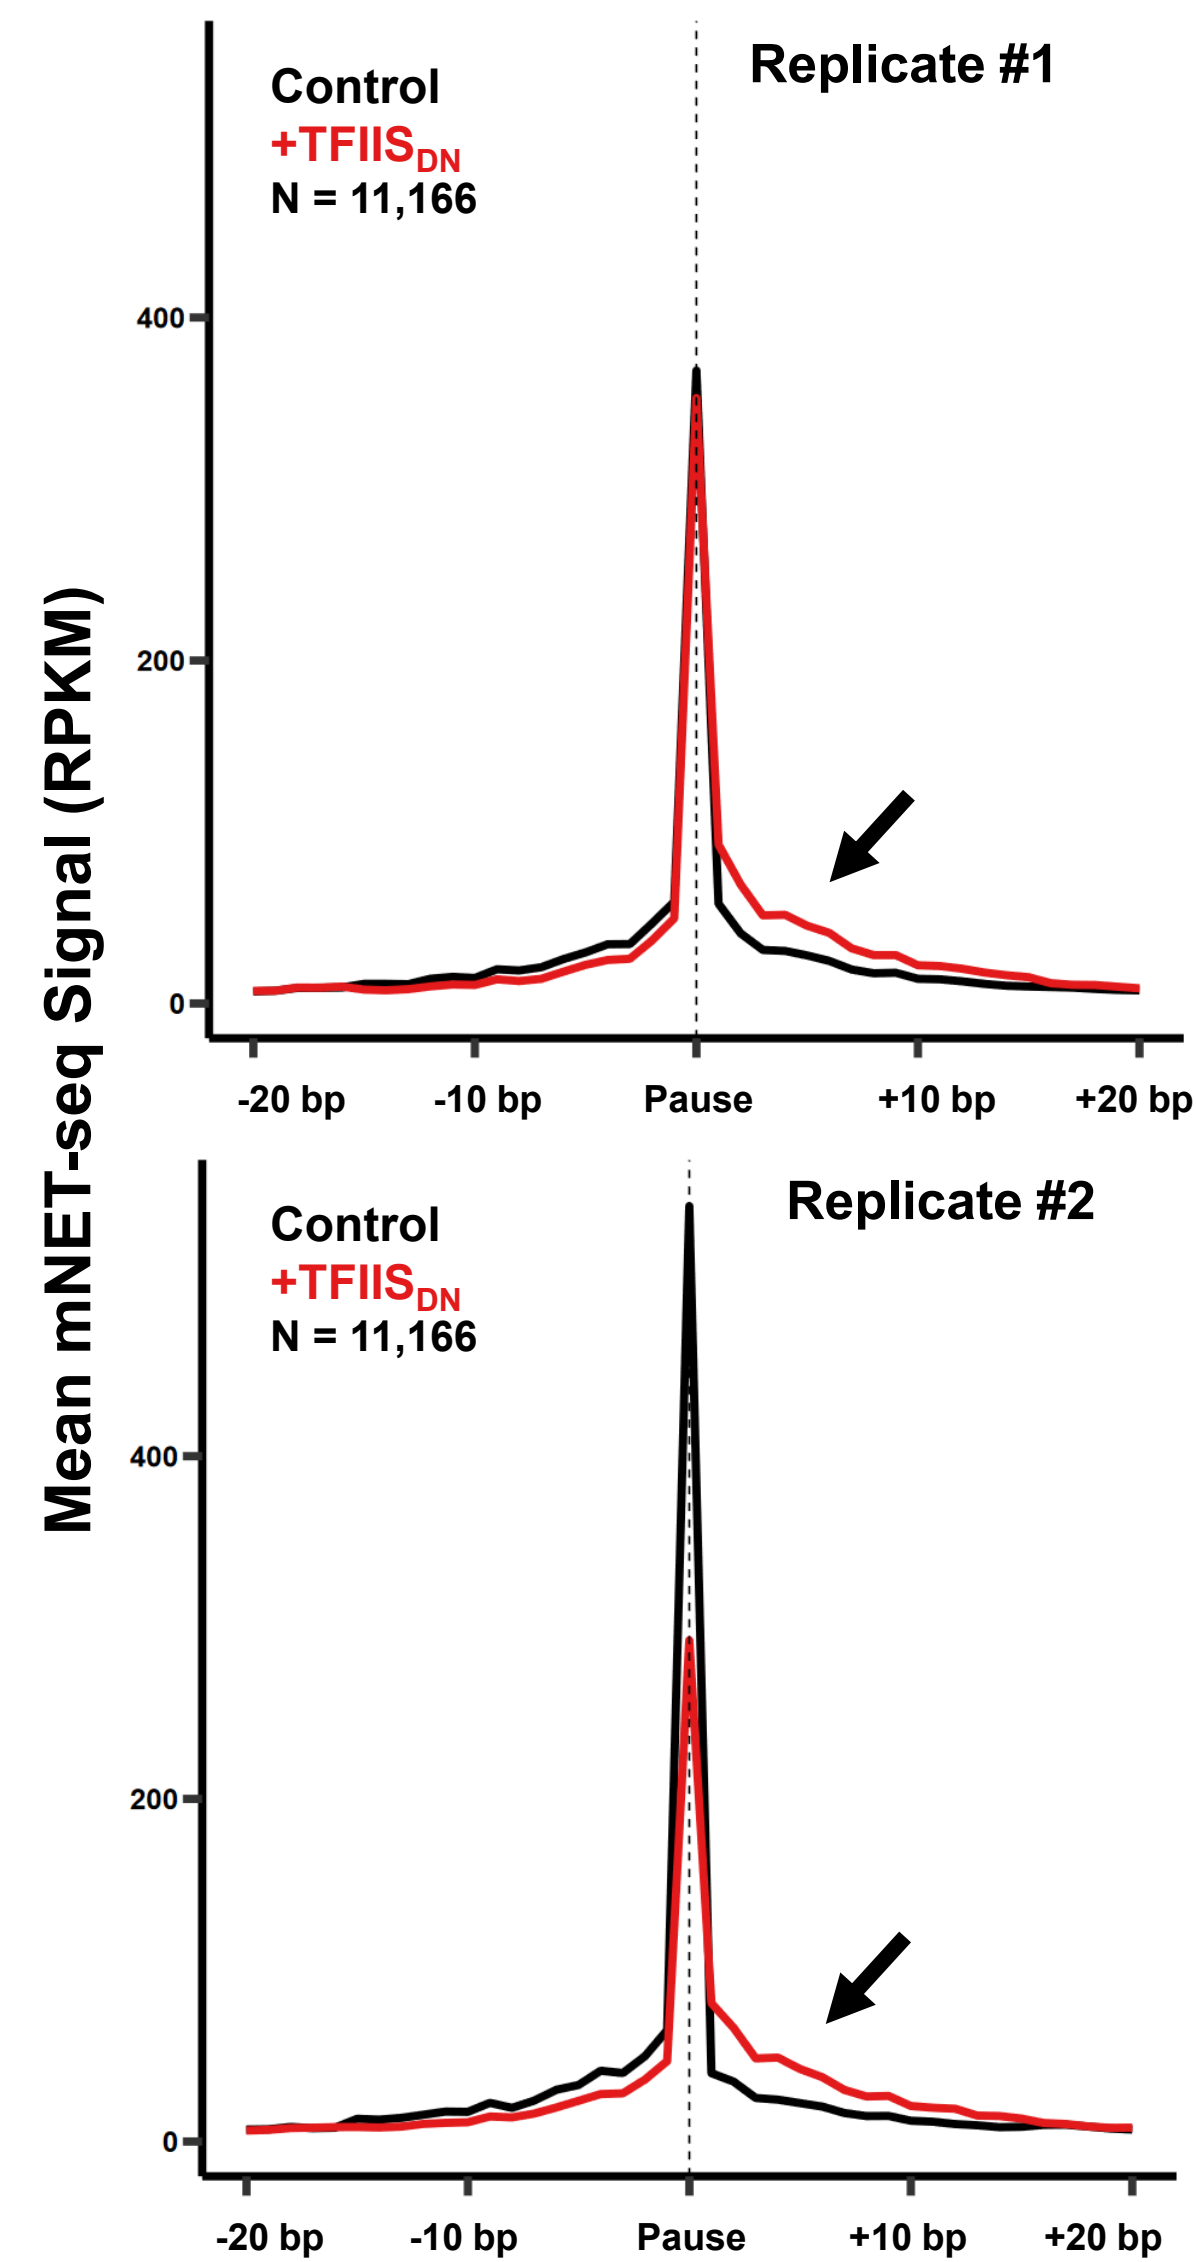**C**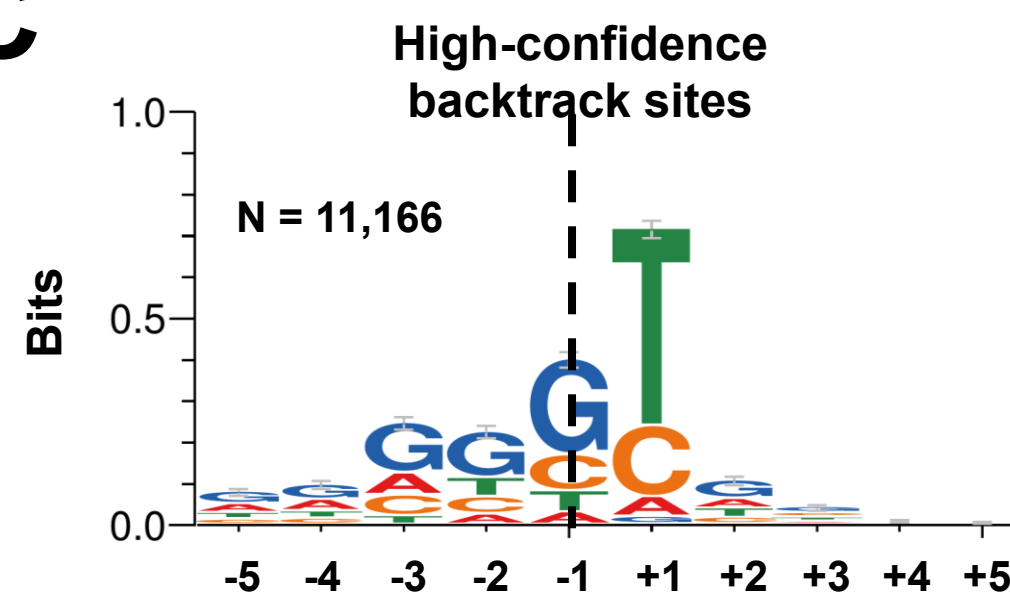

Fig. S7

**Figure S7, related to figures 4 and 5.**

(A) Metaplots of mNET-seq signals (1 bp bins) for uninduced and TFIIIS<sub>DN</sub>-expressing cells for each biological replicate used in Fig. 4E. The lower panel shows a zoomed in view of the plots.

Data were plotted for pause sites present in both control datasets, separated by at least 30bp and containing signal within 15 bp upstream or downstream of the pause (39,543 pauses).

(B) Metaplots of mNET-seq signals (1 bp bins) around pauses identified as high confidence backtracking sites (11,166 sites) for uninduced and TFIIIS<sub>DN</sub>-expressing cells for each biological replicate used in Fig. 5B. Data were plotted for high confidence backtrack sites identified in the region from the TSS to +5 kb downstream of the poly(A) site.

(C) Sequence logo for the region surrounding high confidence backtrack sites (11,166 sites).

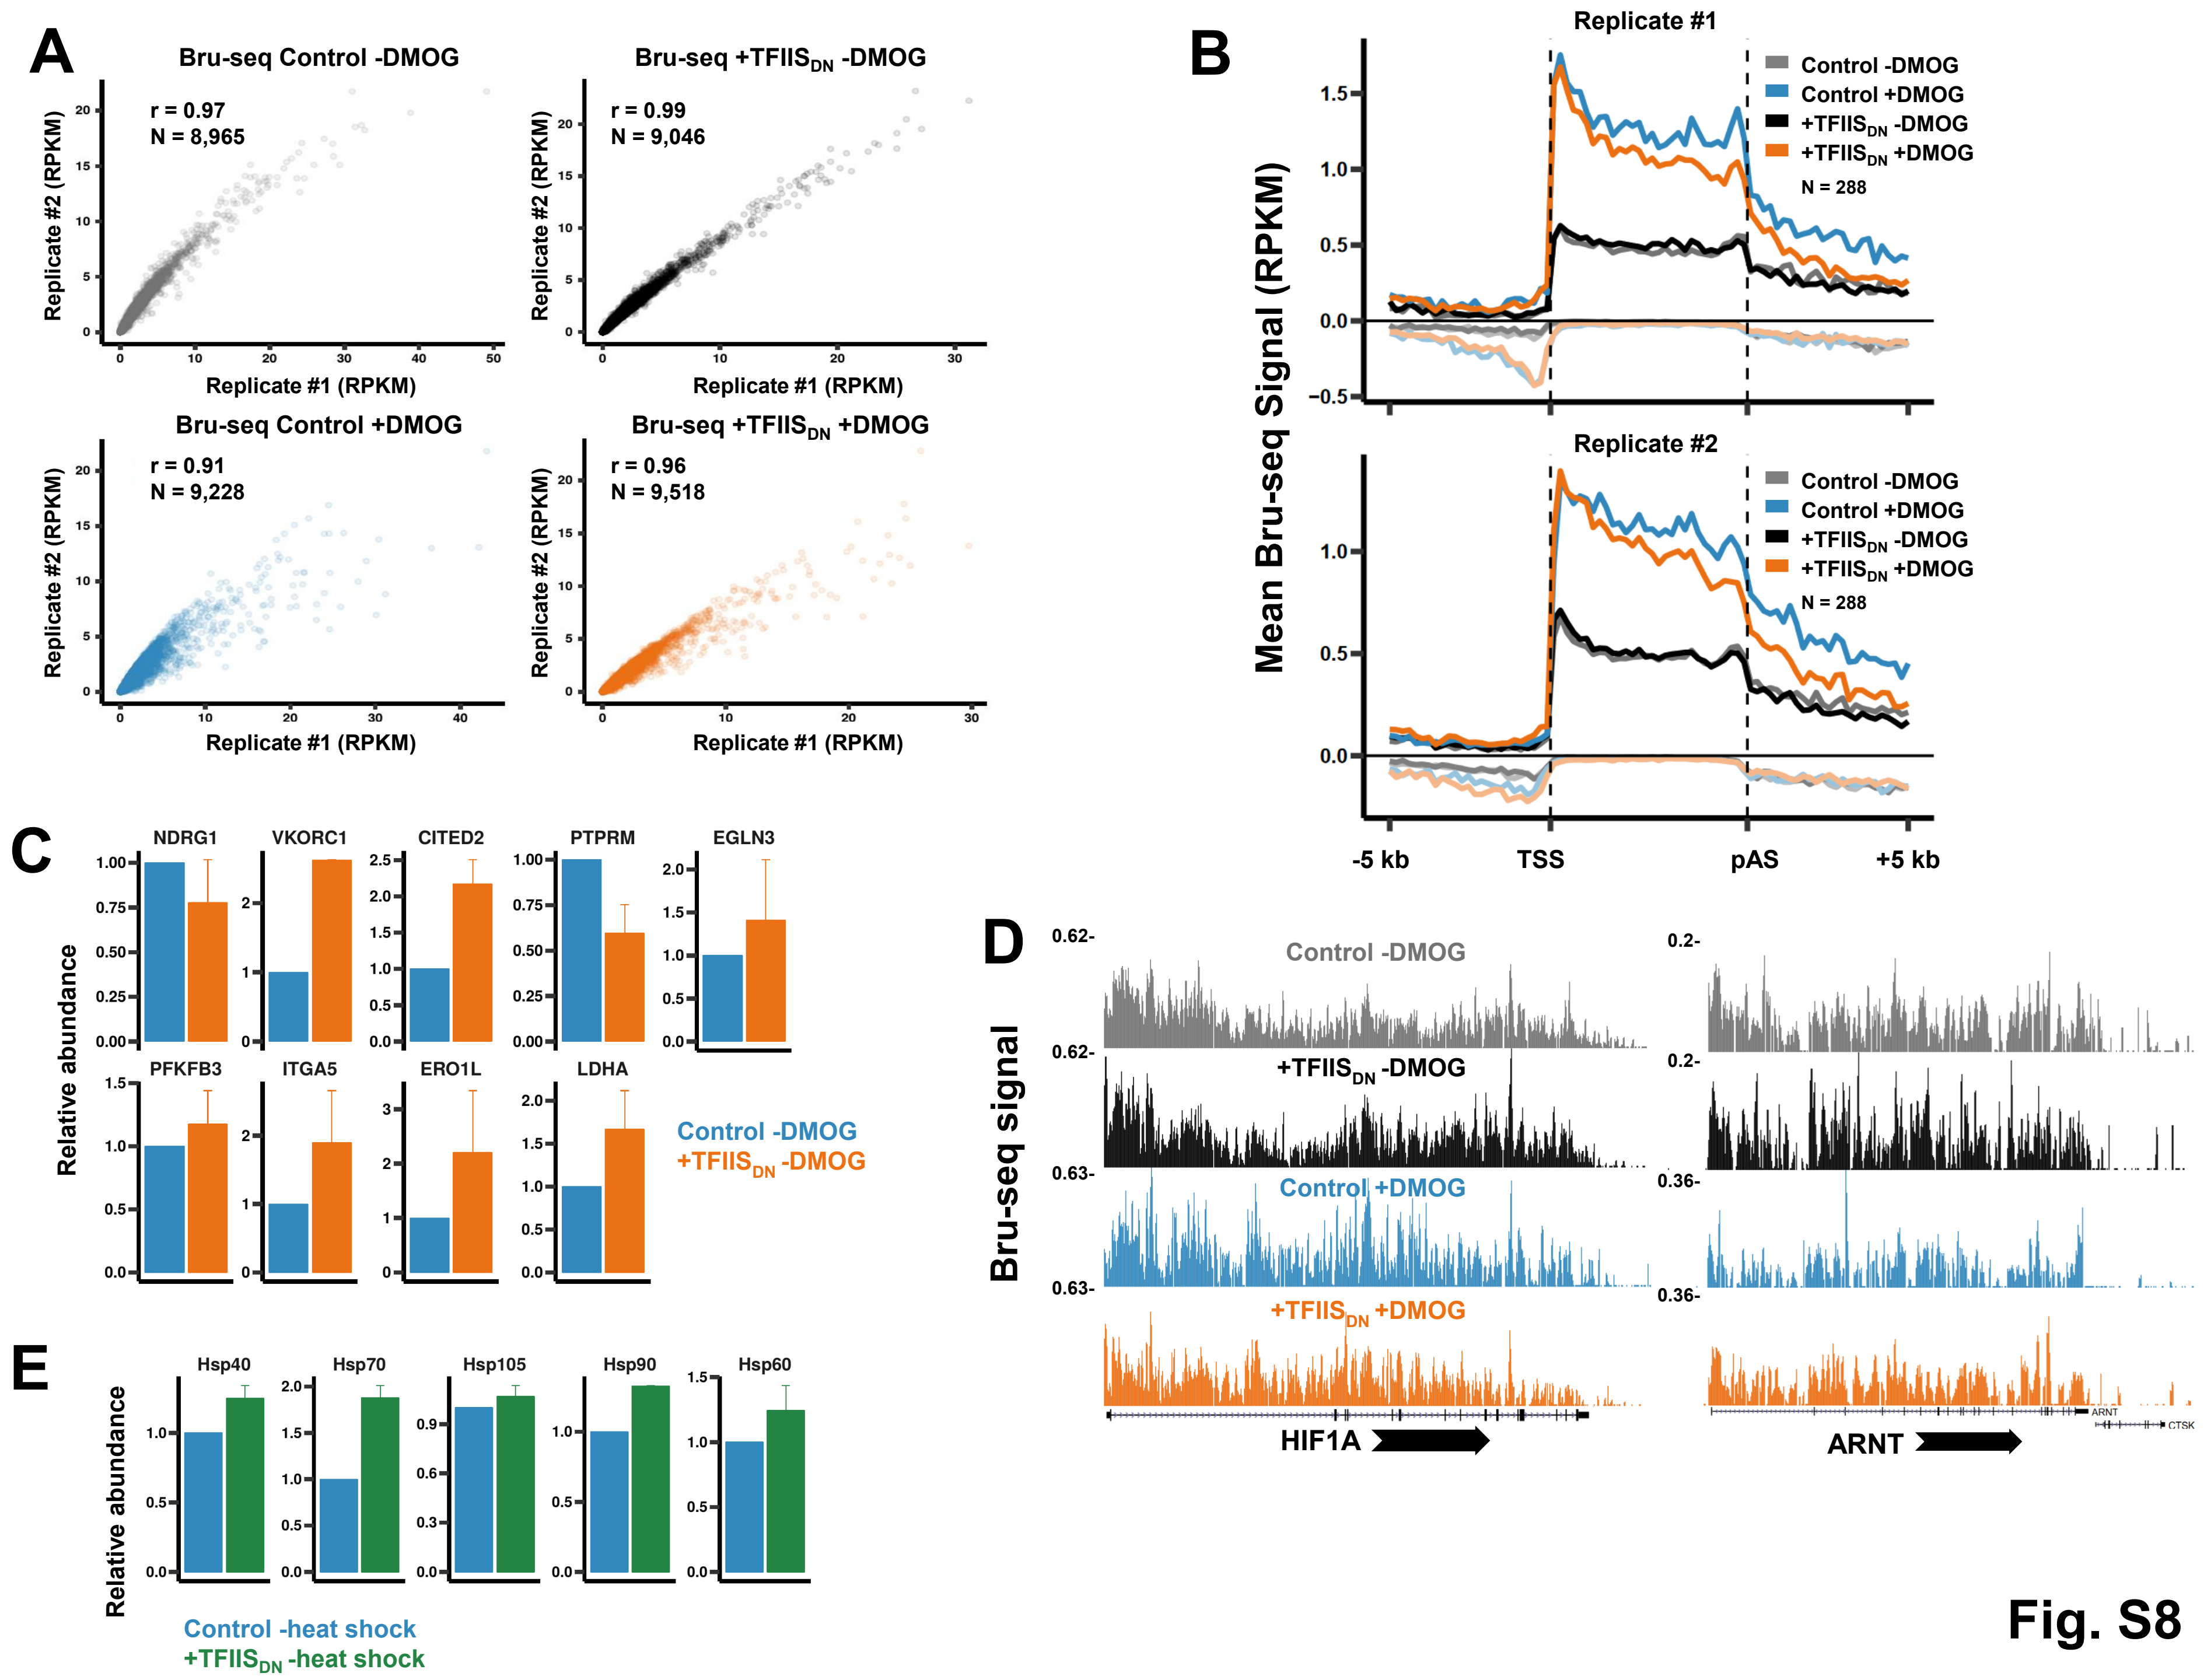

**Figure S8, related to figure 6.**

(A) Scatter plots comparing the Bru-seq signal within each gene for each biological replicate used in Fig 6A. Genes are included that are >1kb long, separated by >2kb, have at least one mapped read and are present in both datasets being compared. The Pearson correlation coefficient is shown.

(B) Metaplots of Bru-seq signals for each biological replicate used in Fig. 6A for cells treated +/- 2 mM DMOG for 16 hours. Data were plotted for 200 bp bins for the regions from -5 kb to the TSS and from the poly(A) site to +5 kb downstream, and 30 bins of variable length for the region from the TSS to the poly(A) site for genes with increased signal +DMOG (p-value < 0.01). Negative values correspond to anti-sense signal.

(C) qRT-PCR showing the relative baseline levels of uninduced hypoxia-responsive transcripts shown in Fig. 6B and C after expression of TFIIIS<sub>DN</sub> for 24 hours. Error bars represent the SEM for at least two biological replicates.

(D) UCSC genome browser screen shots showing Bru-seq signal for HIF1A (left) and the HIF binding partner, ARNT (right) before and after expression of TFIIIS<sub>DN</sub>.

(E) qRT-PCR showing the relative baseline levels of uninduced heat shock transcripts shown in Fig. 6E after expression of TFIIIS<sub>DN</sub> for 24 hours. Error bars represent the SEM for two biological replicates.
